# Supplementary material for: Anchoring of palladium nanoparticles on N-doped mesoporous carbon
Source: Royal Society of Chemistry journal article supplement (doi:10.1039/d0cp03234d), 2020-01-01
Supplement: d0cp03234d1.pdf [file d0cp03234d1.pdf]

## Supporting Information

### Anchoring of palladium nanoparticles on N-doped mesoporous carbon

Lisa Warczinski<sup>a\*</sup>, Bin Hu<sup>b,c</sup>, Till Eckhard<sup>b</sup>, Baoxiang Peng<sup>b,c</sup>, Martin Muhler<sup>b,c</sup> and Christof Hättig<sup>a</sup>

[a] Chair of Theoretical Chemistry, Ruhr-University Bochum, 44780 Bochum, Germany

[b] Laboratory of Industrial Chemistry, Ruhr-University Bochum, 44780 Bochum, Germany

[c] Max Planck Institute for Chemical Energy Conversion, 45470 Mülheim a.d. Ruhr,  
Germany

\*Corresponding author. Email: [lisa.warczinski@ruhr-uni-bochum.de](mailto:lisa.warczinski@ruhr-uni-bochum.de) (L. W)

## Experimental

**Table S1.** Physicochemical properties of the carbon materials and supported catalysts.

| Sample | Pd <sup>a</sup><br>[wt%] | $S_{\text{BET}}^b$<br>[m <sup>2</sup> g <sup>-1</sup> ] | $V_{\text{pore}}$<br>[cm <sup>3</sup> g <sup>-1</sup> ] | $D_{\text{pore}}^c$<br>[nm] | $D_{\text{particle}}^d$<br>[nm] |
|--------|--------------------------|---------------------------------------------------------|---------------------------------------------------------|-----------------------------|---------------------------------|
| NMC    | –                        | 657                                                     | 0.7                                                     | 4.9                         | –                               |
| CMC    | –                        | 997                                                     | 1.2                                                     | 5.0                         | –                               |
| Pd/NMC | 0.95                     | 625                                                     | 0.7                                                     | 4.7                         | 3.4                             |
| Pd/CMC | 0.98                     | 971                                                     | 1.2                                                     | 4.9                         | 4.2                             |

[a] Pd loading determined by AAS;

[b] Specific surface area (BET method);

[c] Average pore diameter (BJH method);

[d] Mean particle size from TEM.

**Table S2.** Chemical compositions of NMC, CMC, Pd/NMC, and Pd/CMC.

| Sample | N (wt/at %)       |                    | O (at %)           |
|--------|-------------------|--------------------|--------------------|
|        | bulk <sup>a</sup> | surf. <sup>b</sup> | surf. <sup>b</sup> |
| NMC    | 13.4              | 10.6               | 6.3                |
| CMC    | –                 | –                  | 11.0               |
| Pd/NMC | 13.3              | 10.1               | 8.1                |
| Pd/CMC | –                 | –                  | 11.5               |

[a] Bulk composition determined by elemental analysis;

[b] Surface composition determined by XPS.

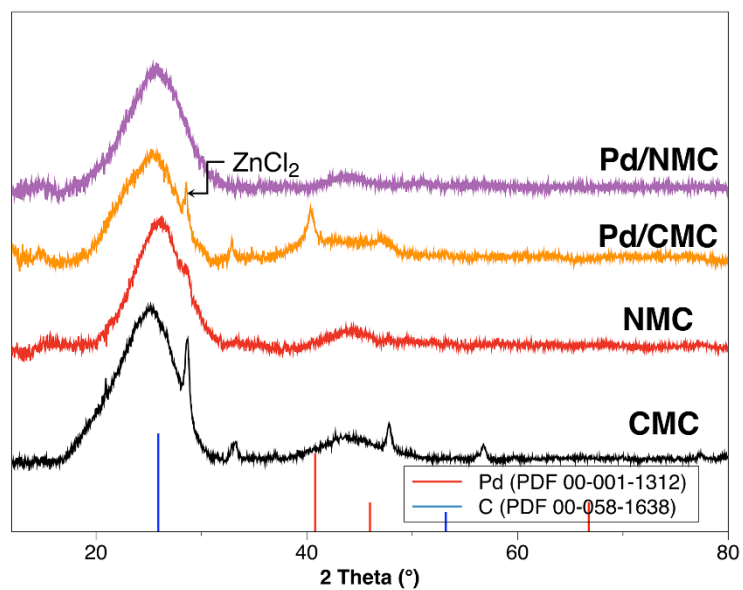

**Figure S1.** XRD patterns of Pd/NMC, Pd/CMC and the mesoporous carbon supports.

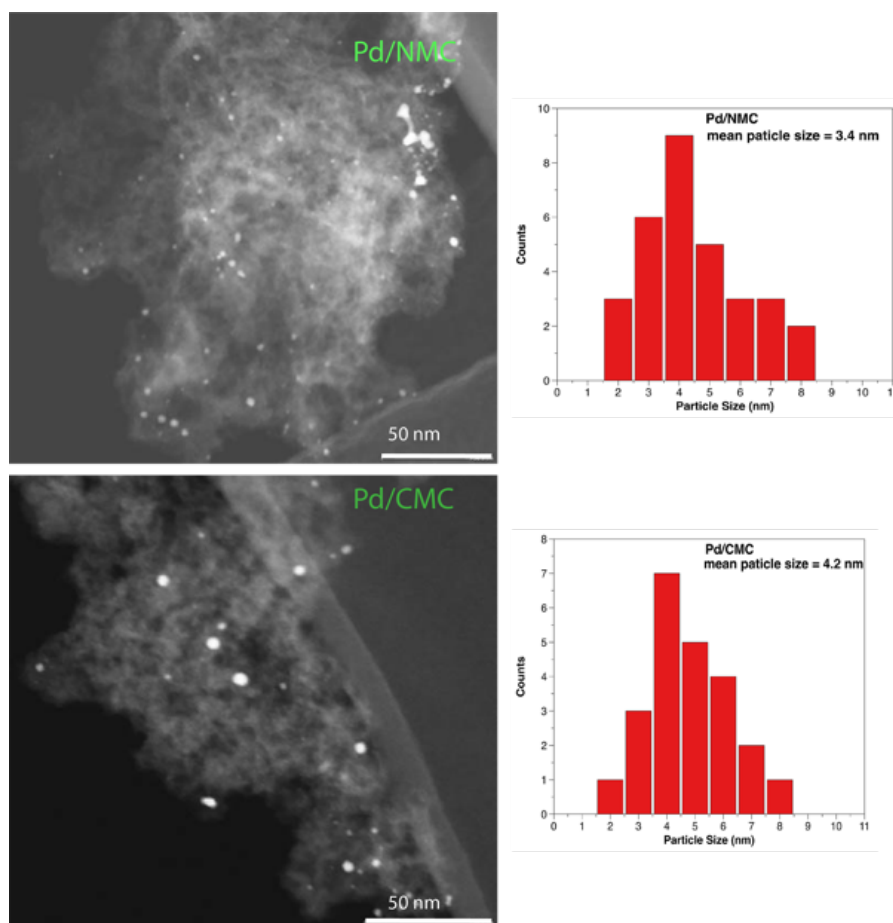

**Figure S2.** HAADF-STEM images and Pd particle size distributions for Pd/NMC and Pd/CMC.

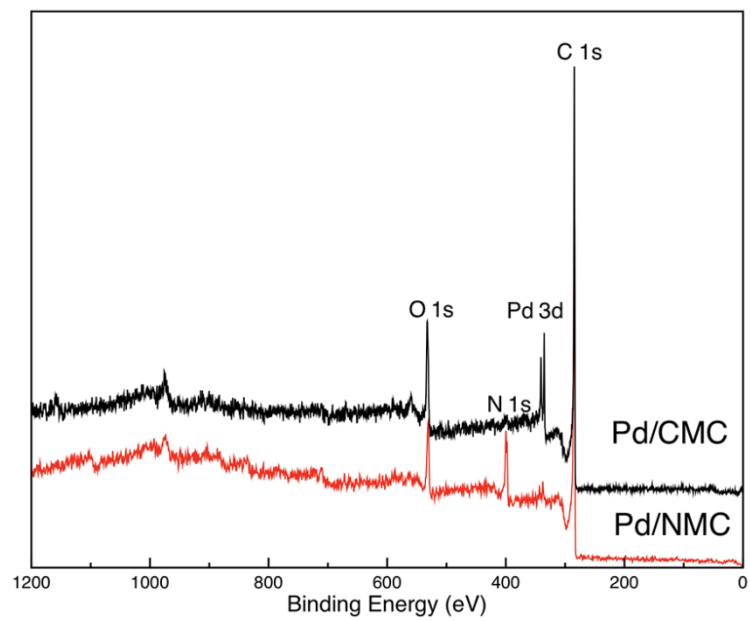

**Figure S3.** XP survey spectra of Pd/NMC and Pd/CMC.

## Computational

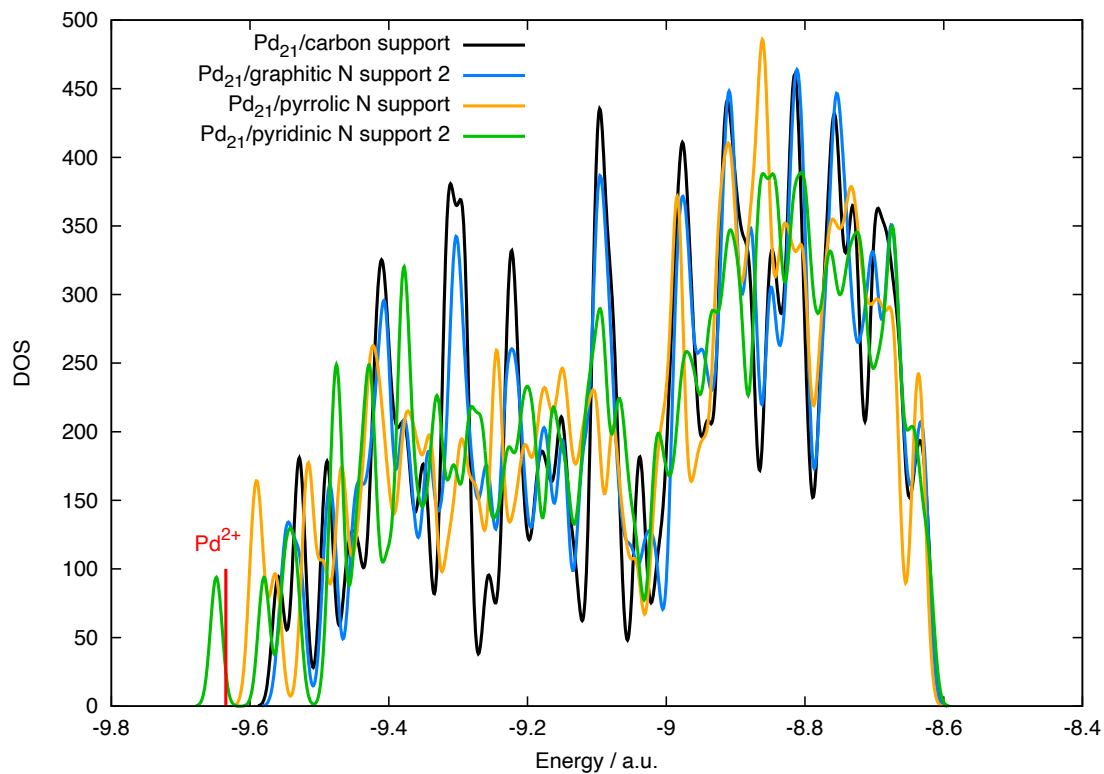

**Figure S4.** Pd 3d density of states plot for the different Pd<sub>21</sub> systems.

## Coordinates of the studied structures

180

Graphitic N support material

|   |            |            |           |
|---|------------|------------|-----------|
| C | 11.1286669 | 0.6897803  | 0.0769510 |
| C | 11.1310353 | -0.6788594 | 0.0747329 |
| C | 9.9012069  | -1.4390640 | 0.0727021 |
| C | 9.8849673  | -2.8352104 | 0.0704892 |
| C | 8.6690148  | -3.5796552 | 0.0684565 |
| C | 8.6455055  | -4.9925504 | 0.0662302 |
| C | 7.4373606  | -5.7216759 | 0.0642087 |
| C | 7.4035693  | -7.1482871 | 0.0620368 |
| C | 6.2050660  | -7.8627055 | 0.0600422 |

---

|   |             |             |           |
|---|-------------|-------------|-----------|
| C | 6.1643253   | -9.3080801  | 0.0578234 |
| C | 4.9797686   | -9.9930362  | 0.0559343 |
| C | 3.7078441   | -9.3056469  | 0.0559964 |
| C | 2.4896215   | -9.9857925  | 0.0540851 |
| C | 1.2392073   | -9.3014376  | 0.0541562 |
| C | 0.0037781   | -9.9866408  | 0.0522224 |
| C | -1.2285859  | -9.3043134  | 0.0523428 |
| C | -2.4824760  | -9.9903636  | 0.0503888 |
| C | -3.6990802  | -9.3132479  | 0.0505853 |
| C | -4.9695746  | -10.0037452 | 0.0485697 |
| C | -6.1534577  | -9.3201533  | 0.0488651 |
| C | -6.1943737  | -7.8746826  | 0.0510879 |
| C | -7.3923292  | -7.1668439  | 0.0514023 |
| C | -7.4303984  | -5.7404130  | 0.0536230 |
| C | -8.6364548  | -5.0195416  | 0.0539315 |
| C | -8.6639583  | -3.6050501  | 0.0561616 |
| C | -9.8811937  | -2.8707714  | 0.0565210 |
| C | -9.9056171  | -1.4731789  | 0.0587362 |
| C | -11.1375156 | -0.7198628  | 0.0590165 |
| C | -11.1391337 | 0.6495800   | 0.0612729 |
| C | -9.9107337  | 1.4098469   | 0.0632473 |
| C | -9.8969611  | 2.8096458   | 0.0654343 |
| C | -8.6836372  | 3.5549100   | 0.0674090 |
| C | -8.6598919  | 4.9682951   | 0.0696575 |
| C | -7.4504424  | 5.6986467   | 0.0716441 |
| C | -7.4180246  | 7.1239129   | 0.0739518 |
| C | -4.9975222  | 9.9736171   | 0.0801481 |
| C | -6.2192771  | 7.8413614   | 0.0758978 |
| C | -6.1813944  | 9.2863125   | 0.0782471 |
| C | -2.5067571  | 9.9729765   | 0.0819343 |
| C | -3.7247527  | 9.2889874   | 0.0799526 |
| C | -0.0187869  | 9.9772460   | 0.0837157 |
| C | -1.2555188  | 9.2920152   | 0.0817172 |
| C | 2.4683117   | 9.9811547   | 0.0855514 |
| C | 1.2155383   | 9.2961727   | 0.0835426 |
| C | 4.9574519   | 9.9910117   | 0.0873478 |
| C | 6.1429969   | 9.3084263   | 0.0871548 |
| C | 3.6857364   | 9.3019388   | 0.0853616 |
| C | 6.1858309   | 7.8624899   | 0.0848636 |
| C | 7.3845870   | 7.1506638   | 0.0845788 |
| C | 7.4216157   | 5.7226869   | 0.0823030 |
| C | 8.6301943   | 4.9970771   | 0.0819887 |

---

|   |            |            |           |
|---|------------|------------|-----------|
| C | 8.6576202  | 3.5825403  | 0.0797437 |
| C | 9.8753132  | 2.8421452  | 0.0794421 |
| C | 9.8963626  | 1.4456818  | 0.0772423 |
| C | 8.6497597  | 0.7128868  | 0.0751960 |
| C | 8.6522033  | -0.7099274 | 0.0729670 |
| C | 7.4178827  | -1.4303521 | 0.0709594 |
| C | 7.4177992  | -2.8579080 | 0.0686666 |
| C | 6.1838126  | -3.5755026 | 0.0665848 |
| C | 6.1840003  | -5.0023400 | 0.0643476 |
| C | 4.9500335  | -5.7186887 | 0.0622934 |
| C | 4.9470444  | -7.1483905 | 0.0601413 |
| C | 3.7166519  | -7.8591470 | 0.0581245 |
| C | 2.4759269  | -7.1479937 | 0.0582257 |
| C | 1.2385754  | -7.8582410 | 0.0562814 |
| C | 0.0000002  | -7.1461182 | 0.0564751 |
| C | -1.2319724 | -7.8614928 | 0.0545200 |
| C | -2.4702130 | -7.1508741 | 0.0547709 |
| C | -3.7122282 | -7.8652197 | 0.0528147 |
| C | -4.9353549 | -7.1559606 | 0.0530801 |
| C | -4.9432387 | -5.7222146 | 0.0553399 |
| C | -6.1767163 | -5.0174705 | 0.0556057 |
| C | -6.1753112 | -3.5943723 | 0.0578719 |
| C | -7.4135583 | -2.8797964 | 0.0581572 |
| C | -7.4240082 | -1.4548595 | 0.0604314 |
| C | -8.6600910 | -0.7402656 | 0.0607631 |
| C | -8.6647419 | 0.6842768  | 0.0629582 |
| C | -7.4287426 | 1.4068355  | 0.0648787 |
| C | -7.4310412 | 2.8335021  | 0.0671046 |
| C | -6.1968073 | 3.5509203  | 0.0690518 |
| C | -6.1973327 | 4.9806448  | 0.0713155 |
| C | -3.7314944 | 7.8424697  | 0.0775921 |
| C | -4.9650443 | 5.6981761  | 0.0732587 |
| C | -4.9620015 | 7.1292704  | 0.0755778 |
| C | -1.2550543 | 7.8475028  | 0.0793815 |
| C | -2.4902715 | 7.1339768  | 0.0773222 |
| C | 1.2198299  | 7.8508340  | 0.0812532 |
| C | -0.0164181 | 7.1381651  | 0.0791842 |
| C | 3.6978665  | 7.8535896  | 0.0830849 |
| C | 4.9275502  | 7.1459383  | 0.0828241 |
| C | 2.4564663  | 7.1409601  | 0.0810750 |
| C | 4.9346898  | 5.7141188  | 0.0805296 |
| C | 6.1696431  | 5.0005542  | 0.0802467 |

---

|   |            |            |           |
|---|------------|------------|-----------|
| C | 6.1737428  | 3.5730094  | 0.0779567 |
| C | 7.4096865  | 2.8579248  | 0.0776837 |
| C | 7.4131443  | 1.4299712  | 0.0754361 |
| C | 6.1740959  | 0.7108180  | 0.0734492 |
| C | 6.1765167  | -0.7148989 | 0.0711816 |
| C | 4.9394560  | -1.4329349 | 0.0690907 |
| C | 4.9399243  | -2.8603228 | 0.0667502 |
| C | 3.7049337  | -3.5745593 | 0.0646845 |
| C | 3.7079064  | -5.0045643 | 0.0624224 |
| C | 2.4748148  | -5.7174382 | 0.0603838 |
| C | 1.2336599  | -5.0039782 | 0.0606136 |
| C | -0.0020763 | -5.7098508 | 0.0586639 |
| C | -1.2430890 | -4.9978382 | 0.0589291 |
| C | -2.4732115 | -5.7263356 | 0.0570015 |
| C | -3.6991526 | -5.0039128 | 0.0573317 |
| C | -3.7016219 | -3.5780789 | 0.0595745 |
| C | -4.9317937 | -2.8717285 | 0.0598722 |
| C | -4.9524528 | -1.4436133 | 0.0620927 |
| C | -6.1831429 | -0.7352350 | 0.0623807 |
| C | -6.1878502 | 0.6938858  | 0.0645849 |
| C | -4.9516275 | 1.4065262  | 0.0664846 |
| C | -4.9553811 | 2.8360404  | 0.0687301 |
| C | -2.4892406 | 5.7002492  | 0.0750089 |
| C | -3.7211707 | 3.5543798  | 0.0706943 |
| C | -3.7229445 | 4.9849239  | 0.0729585 |
| C | -0.0145570 | 5.7039363  | 0.0768907 |
| C | -1.2507465 | 4.9887747  | 0.0748236 |
| C | 2.4589755  | 5.7085412  | 0.0787946 |
| C | 3.6953203  | 4.9975398  | 0.0785413 |
| C | 1.2208828  | 4.9927595  | 0.0767060 |
| C | 3.6981822  | 3.5667401  | 0.0762296 |
| C | 4.9332238  | 2.8549137  | 0.0759697 |
| C | 4.9345889  | 1.4251868  | 0.0737028 |
| C | 3.6999820  | 0.7099216  | 0.0716248 |
| C | 3.7013026  | -0.7205808 | 0.0693363 |
| C | 2.4662835  | -1.4363545 | 0.0673406 |
| C | 2.4637508  | -2.8620352 | 0.0649445 |
| C | 1.2247756  | -3.5789365 | 0.0628749 |
| C | -0.0156610 | -2.8628173 | 0.0631709 |
| C | -1.2493091 | -3.5735205 | 0.0611464 |
| N | -2.4726603 | -2.8696368 | 0.0614566 |
| C | -2.4768775 | -1.4511831 | 0.0637029 |



---

|   |             |             |           |
|---|-------------|-------------|-----------|
| C | -3.7093087  | -0.7414335  | 0.0639426 |
| C | -3.7102412  | 0.6919405   | 0.0662144 |
| C | -1.2495641  | 3.5588098   | 0.0725546 |
| C | -2.4811936  | 1.4118753   | 0.0682601 |
| C | -2.4840344  | 2.8434298   | 0.0704958 |
| C | 1.2225538   | 3.5614254   | 0.0743811 |
| C | 2.4600281   | 2.8506503   | 0.0741522 |
| C | 2.4610786   | 1.4225647   | 0.0719095 |
| C | -0.0128694  | 2.8450954   | 0.0723833 |
| C | -0.0117519  | 1.4139923   | 0.0701209 |
| C | 1.2252109   | 0.7078778   | 0.0699154 |
| C | 1.2260344   | -0.7233309  | 0.0676201 |
| C | -0.0026743  | -1.4347134  | 0.0655492 |
| C | -1.2468086  | -0.7367413  | 0.0657741 |
| C | -1.2504148  | 0.6966223   | 0.0680613 |
| H | -4.9956083  | 11.0692861  | 0.0818167 |
| H | -0.0204991  | 11.0732724  | 0.0854282 |
| H | 12.0788459  | -1.2287745  | 0.0744121 |
| H | 2.4667260   | 11.0772964  | 0.0873099 |
| H | -10.8280672 | -3.4226530  | 0.0550448 |
| H | 2.4877456   | -11.0818023 | 0.0524857 |
| H | -10.8486566 | 3.3532619   | 0.0656342 |
| H | -9.5851364  | -5.5679474  | 0.0523758 |
| H | -8.3684332  | 7.6699578   | 0.0741892 |
| H | -7.1336322  | 9.8282739   | 0.0784472 |
| H | 4.9515174   | 11.0866634  | 0.0890141 |
| H | -12.0831905 | -1.2733314  | 0.0572560 |
| H | -12.0872100 | 1.1991510   | 0.0617623 |
| H | 8.3533491   | -7.6953396  | 0.0619737 |
| H | 7.1156235   | -9.8516204  | 0.0576311 |
| H | 10.8242570  | 3.3908419   | 0.0810171 |
| H | 12.0746258  | 1.2429026   | 0.0786810 |
| H | -4.9629807  | -11.0992310 | 0.0467253 |
| H | 8.3335464   | 7.6992362   | 0.0861790 |
| H | 9.5956828   | -5.5385927  | 0.0660468 |
| H | -9.6101189  | 5.5141450   | 0.0698133 |
| H | -7.1052532  | -9.8625502  | 0.0474847 |
| H | 4.9754734   | -11.0886348 | 0.0543040 |
| H | 9.5794025   | 5.5449380   | 0.0835264 |
| H | 10.8353887  | -3.3812051  | 0.0702964 |
| H | 7.0935178   | 9.8533298   | 0.0888317 |
| H | -2.4793835  | -11.0863174 | 0.0486659 |

---

|   |            |             |           |
|---|------------|-------------|-----------|
| H | -8.3407288 | -7.7160998  | 0.0499487 |
| H | 0.0045150  | -11.0824921 | 0.0505784 |
| H | -2.5088733 | 11.0690931  | 0.0837404 |

179

Pyridinic N b support material

|   |             |            |            |
|---|-------------|------------|------------|
| C | 11.2389295  | 0.7339786  | -0.0186717 |
| C | 11.2541223  | -0.6333272 | -0.0387681 |
| C | 10.0289831  | -1.4010085 | -0.0379923 |
| C | 10.0226273  | -2.7958189 | -0.0638953 |
| C | 8.8095079   | -3.5475354 | -0.0657203 |
| C | 8.7867812   | -4.9598727 | -0.0933919 |
| C | 7.5789981   | -5.6929892 | -0.0950930 |
| C | 7.5424712   | -7.1195369 | -0.1182246 |
| C | 6.3415409   | -7.8297899 | -0.1127000 |
| C | 6.2967630   | -9.2747606 | -0.1289505 |
| C | 5.1084982   | -9.9516739 | -0.1154205 |
| C | 3.8386811   | -9.2590678 | -0.0851505 |
| C | 2.6233919   | -9.9408978 | -0.0625528 |
| C | 1.3742637   | -9.2547051 | -0.0297182 |
| C | 0.1423590   | -9.9457206 | 0.0030828  |
| C | -1.0917495  | -9.2668215 | 0.0404401  |
| C | -2.3393262  | -9.9606988 | 0.0793742  |
| C | -3.5615493  | -9.2906858 | 0.1161616  |
| C | -4.8292266  | -9.9864481 | 0.1562746  |
| C | -6.0184681  | -9.3103302 | 0.1892446  |
| C | -6.0683681  | -7.8648099 | 0.1855578  |
| C | -7.2698943  | -7.1559493 | 0.2138590  |
| C | -7.3112578  | -5.7285817 | 0.2063341  |
| C | -8.5216009  | -5.0028011 | 0.2286139  |
| C | -8.5512634  | -3.5894476 | 0.2161788  |
| C | -9.7692207  | -2.8480206 | 0.2314173  |
| C | -9.7883861  | -1.4520387 | 0.2141775  |
| C | -11.0201058 | -0.6951105 | 0.2259223  |
| C | -11.0198417 | 0.6730700  | 0.2060565  |
| C | -9.7885237  | 1.4307256  | 0.1736793  |
| C | -9.7721664  | 2.8262048  | 0.1526355  |
| C | -8.5552891  | 3.5683800  | 0.1223187  |
| C | -8.5347212  | 4.9802631  | 0.1019165  |
| C | -7.3265329  | 5.7112657  | 0.0756919  |
| C | -7.3005542  | 7.1364582  | 0.0568035  |
| C | -4.8913319  | 9.9924593  | 0.0016236  |

---

|   |            |            |            |
|---|------------|------------|------------|
| C | -6.1043666 | 7.8556255  | 0.0353373  |
| C | -6.0721227 | 9.3012043  | 0.0183477  |
| C | -2.4012114 | 9.9996861  | -0.0117801 |
| C | -3.6160907 | 9.3113574  | 0.0005088  |
| C | 0.0890969  | 10.0102022 | -0.0166399 |
| C | -1.1463331 | 9.3224752  | -0.0095694 |
| C | 2.5800058  | 10.0155746 | -0.0130437 |
| C | 1.3264825  | 9.3312693  | -0.0092926 |
| C | 5.0717039  | 10.0211911 | -0.0063342 |
| C | 6.2555741  | 9.3349033  | 0.0026977  |
| C | 3.7982182  | 9.3352399  | -0.0035251 |
| C | 6.2944496  | 7.8888990  | 0.0157325  |
| C | 7.4894080  | 7.1703892  | 0.0218848  |
| C | 7.5194141  | 5.7426230  | 0.0314875  |
| C | 8.7281767  | 5.0188018  | 0.0296861  |
| C | 8.7527612  | 3.6062591  | 0.0304553  |
| C | 9.9755854  | 2.8738371  | 0.0158187  |
| C | 9.9999718  | 1.4806080  | 0.0036714  |
| C | 8.7544773  | 0.7432927  | 0.0098663  |
| C | 8.7739783  | -0.6773153 | -0.0107010 |
| C | 7.5461185  | -1.4017065 | -0.0082592 |
| C | 7.5571097  | -2.8293108 | -0.0374592 |
| C | 6.3316606  | -3.5518923 | -0.0404896 |
| C | 6.3267985  | -4.9743558 | -0.0701153 |
| C | 5.0890468  | -5.6863998 | -0.0709825 |
| C | 5.0833325  | -7.1117667 | -0.0876650 |
| C | 3.8468870  | -7.8120101 | -0.0749660 |
| C | 2.6061358  | -7.0942533 | -0.0490310 |
| C | 1.3725531  | -7.8129042 | -0.0271057 |
| C | 0.1361982  | -7.0999639 | 0.0030608  |
| C | -1.0979111 | -7.8222105 | 0.0398397  |
| C | -2.3405319 | -7.1249936 | 0.0766121  |
| C | -3.5790580 | -7.8443184 | 0.1140589  |
| C | -4.8131118 | -7.1435812 | 0.1486489  |
| C | -4.8254401 | -5.7141676 | 0.1445659  |
| C | -6.0615260 | -5.0032594 | 0.1722962  |
| C | -6.0694810 | -3.5766999 | 0.1641554  |
| C | -7.3036241 | -2.8626218 | 0.1841485  |
| C | -7.3053481 | -1.4361018 | 0.1684058  |
| C | -8.5406483 | -0.7192134 | 0.1821035  |
| C | -8.5390500 | 0.7022641  | 0.1630481  |
| C | -7.3020047 | 1.4228807  | 0.1325784  |

---

|   |            |            |            |
|---|------------|------------|------------|
| C | -7.3039000 | 2.8482653  | 0.1131170  |
| C | -6.0693552 | 3.5661469  | 0.0861218  |
| C | -6.0733508 | 4.9943672  | 0.0690406  |
| C | -3.6187573 | 7.8642884  | 0.0145912  |
| C | -4.8422219 | 5.7128347  | 0.0466886  |
| C | -4.8449064 | 7.1446537  | 0.0313148  |
| C | -1.1440133 | 7.8785444  | 0.0027394  |
| C | -2.3764913 | 7.1597776  | 0.0139315  |
| C | 1.3310778  | 7.8861619  | 0.0036814  |
| C | 0.0953227  | 7.1732345  | 0.0078143  |
| C | 3.8090531  | 7.8873685  | 0.0102845  |
| C | 5.0365939  | 7.1744854  | 0.0207351  |
| C | 2.5685275  | 7.1770728  | 0.0134710  |
| C | 5.0404233  | 5.7417877  | 0.0345368  |
| C | 6.2688611  | 5.0190453  | 0.0400377  |
| C | 6.2676360  | 3.5884673  | 0.0507248  |
| C | 7.5069321  | 2.8801195  | 0.0413087  |
| C | 7.5086123  | 1.4523476  | 0.0337944  |
| C | 6.2705113  | 0.7302882  | 0.0464114  |
| C | 6.3012801  | -0.6913468 | 0.0232745  |
| C | 5.0767867  | -1.4181755 | 0.0244483  |
| C | 5.0878831  | -2.8382958 | -0.0128014 |
| C | 3.8571775  | -3.5471866 | -0.0250761 |
| C | 3.8476395  | -4.9704908 | -0.0507613 |
| C | 2.6046783  | -5.6614129 | -0.0425945 |
| C | 1.3653336  | -4.9200609 | -0.0305511 |
| C | 0.1324547  | -5.6647756 | -0.0012343 |
| C | -1.1113767 | -4.9748767 | 0.0373495  |
| C | -2.3479245 | -5.6966280 | 0.0765901  |
| C | -3.5883469 | -4.9944082 | 0.1082457  |
| C | -3.5993131 | -3.5684881 | 0.0994045  |
| C | -4.8305475 | -2.8564766 | 0.1309823  |
| C | -4.8298654 | -1.4287279 | 0.1234370  |
| C | -6.0655421 | -0.7161481 | 0.1379726  |
| C | -6.0596259 | 0.7089625  | 0.1206816  |
| C | -4.8178927 | 1.4248171  | 0.0904922  |
| C | -4.8270195 | 2.8532455  | 0.0774367  |
| C | -2.3721862 | 5.7260432  | 0.0262141  |
| C | -3.5896050 | 3.5669506  | 0.0577063  |
| C | -3.5989486 | 5.0005380  | 0.0425885  |
| C | 0.0989303  | 5.7401246  | 0.0208892  |
| C | -1.1336384 | 5.0190793  | 0.0252237  |

---

|   |             |             |            |
|---|-------------|-------------|------------|
| C | 2.5714985   | 5.7456814   | 0.0288802  |
| C | 3.8034662   | 5.0278368   | 0.0391811  |
| C | 1.3348692   | 5.0360704   | 0.0352033  |
| C | 3.8042192   | 3.5957106   | 0.0580727  |
| C | 5.0265593   | 2.8672606   | 0.0663977  |
| C | 5.0049121   | 1.4260164   | 0.0778652  |
| C | 3.7674649   | 0.7058469   | 0.1119990  |
| C | 3.8036136   | -0.7532612  | 0.0711277  |
| N | 2.6608352   | -1.4496751  | 0.0646196  |
| C | 2.6401123   | -2.7848898  | -0.0029301 |
| C | 1.3625840   | -3.4888413  | -0.0422587 |
| C | 0.0877040   | -2.7826499  | -0.0535915 |
| C | -1.1258708  | -3.5499720  | 0.0257145  |
| C | -2.3638435  | -2.8501033  | 0.0565350  |
| C | -2.3639703  | -1.4288701  | 0.0573256  |
| C | -3.5927700  | -0.7120572  | 0.0919143  |
| C | -3.5777155  | 0.7128667   | 0.0750812  |
| C | -1.1278354  | 3.5896747   | 0.0374431  |
| C | -2.3201911  | 1.4149885   | 0.0564682  |
| C | -2.3493046  | 2.8554475   | 0.0538496  |
| C | 1.3383467   | 3.6066569   | 0.0572635  |
| C | 2.5668534   | 2.8897917   | 0.0719744  |
| C | 2.5156805   | 1.4542027   | 0.1309685  |
| C | 0.1107994   | 2.8909586   | 0.0538487  |
| C | 0.1672950   | 1.4560647   | 0.0987222  |
| N | 1.3363849   | 0.8128421   | 0.2002439  |
| N | 0.0456036   | -1.4411778  | -0.1428852 |
| C | -1.0972123  | -0.7525635  | -0.0154498 |
| C | -1.0789251  | 0.7029954   | 0.0432364  |
| H | -4.8932365  | 11.0879962  | -0.0103398 |
| H | 0.0849856   | 11.1061536  | -0.0263014 |
| H | 12.2060030  | -1.1757372  | -0.0572762 |
| H | 2.5794136   | 11.1116268  | -0.0230893 |
| H | -10.7185660 | -3.3953912  | 0.2556682  |
| H | 2.6216473   | -11.0369027 | -0.0674838 |
| H | -10.7219363 | 3.3732880   | 0.1602857  |
| H | -9.4698264  | -5.5518614  | 0.2539705  |
| H | -8.2527439  | 7.6793363   | 0.0607755  |
| H | -7.0265800  | 9.8390888   | 0.0200147  |
| H | 5.0693699   | 11.1167710  | -0.0163373 |
| H | -11.9665950 | -1.2466207  | 0.2507133  |
| H | -11.9662044 | 1.2252966   | 0.2147373  |

---

|   |            |             |            |
|---|------------|-------------|------------|
| H | 8.4901352  | -7.6699835  | -0.1378380 |
| H | 7.2452451  | -9.8226279  | -0.1505619 |
| H | 10.9212421 | 3.4278888   | 0.0093894  |
| H | 12.1792416 | 1.2965393   | -0.0210774 |
| H | -4.8174115 | -11.0820117 | 0.1592654  |
| H | 8.4417674  | 7.7130185   | 0.0171301  |
| H | 9.7377840  | -5.5045176  | -0.1131848 |
| H | -9.4856429 | 5.5251549   | 0.1079511  |
| H | -6.9653742 | -9.8606029  | 0.2185953  |
| H | 5.0972242  | -11.0471929 | -0.1259312 |
| H | 9.6778144  | 5.5658236   | 0.0224701  |
| H | 10.9767838 | -3.3349355  | -0.0847956 |
| H | 7.2075129  | 9.8772694   | -0.0003597 |
| H | -2.3283720 | -11.0567461 | 0.0802634  |
| H | -8.2165613 | -7.7077812  | 0.2408208  |
| H | 0.1482434  | -11.0416408 | 0.0020444  |
| H | -2.4077033 | 11.0957102  | -0.0215277 |

179

Pyridinic N c support material

|   |            |            |           |
|---|------------|------------|-----------|
| C | 11.1433939 | 0.6981583  | 0.0599017 |
| C | 11.1449063 | -0.6703094 | 0.0587926 |
| C | 9.9144011  | -1.4311059 | 0.0576931 |
| C | 9.8969914  | -2.8266987 | 0.0567240 |
| C | 8.6794718  | -3.5724462 | 0.0555342 |
| C | 8.6536220  | -4.9850925 | 0.0545687 |
| C | 7.4440017  | -5.7153482 | 0.0533388 |
| C | 7.4080564  | -7.1427944 | 0.0523570 |
| C | 6.2088227  | -7.8573036 | 0.0512089 |
| C | 6.1658786  | -9.3034612 | 0.0501370 |
| C | 4.9805592  | -9.9876437 | 0.0490640 |
| C | 3.7069553  | -9.3011830 | 0.0489040 |
| C | 2.4883424  | -9.9825635 | 0.0478239 |
| C | 1.2338697  | -9.2998869 | 0.0475955 |
| C | -0.0046876 | -9.9819208 | 0.0465688 |
| C | -1.2422267 | -9.2980060 | 0.0463471 |
| C | -2.5007877 | -9.9762663 | 0.0452546 |
| C | -3.7185192 | -9.2906210 | 0.0450475 |
| C | -5.0017318 | -9.9620295 | 0.0439021 |
| C | -6.1840859 | -9.2688437 | 0.0437849 |
| C | -6.2220769 | -7.8210043 | 0.0448755 |

---

|   |             |            |           |
|---|-------------|------------|-----------|
| C | -7.4192925  | -7.0935076 | 0.0448370 |
| C | -7.4407282  | -5.6612973 | 0.0458630 |
| N | -8.6241354  | -4.9958284 | 0.0458437 |
| C | -8.6129050  | -3.6383088 | 0.0469900 |
| C | -9.8446861  | -2.9071147 | 0.0471825 |
| C | -9.8798562  | -1.5067064 | 0.0483967 |
| C | -11.1169204 | -0.7532597 | 0.0485381 |
| C | -11.1300536 | 0.6172808  | 0.0497577 |
| C | -9.9092765  | 1.3964768  | 0.0509494 |
| C | -9.8982525  | 2.7939207  | 0.0522687 |
| C | -8.6837756  | 3.5483774  | 0.0533768 |
| C | -8.6613835  | 4.9621124  | 0.0547013 |
| C | -7.4535744  | 5.6973667  | 0.0557308 |
| C | -7.4216473  | 7.1251622  | 0.0570518 |
| C | -5.0027263  | 9.9773077  | 0.0604282 |
| C | -6.2243092  | 7.8434091  | 0.0581191 |
| C | -6.1860371  | 9.2896525  | 0.0593685 |
| C | -2.5105415  | 9.9798661  | 0.0614898 |
| C | -3.7268551  | 9.2949685  | 0.0603770 |
| C | -0.0192301  | 9.9869569  | 0.0625840 |
| C | -1.2543546  | 9.3008651  | 0.0613729 |
| C | 2.4716070   | 9.9918228  | 0.0636296 |
| C | 1.2191011   | 9.3065916  | 0.0624525 |
| C | 4.9629595   | 10.0017763 | 0.0645956 |
| C | 6.1493373   | 9.3197739  | 0.0646212 |
| C | 3.6909465   | 9.3126785  | 0.0635092 |
| C | 6.1938428   | 7.8738648  | 0.0633714 |
| C | 7.3941174   | 7.1615815  | 0.0633396 |
| C | 7.4318390   | 5.7345122  | 0.0621030 |
| C | 8.6428311   | 5.0068872  | 0.0621406 |
| C | 8.6714137   | 3.5945132  | 0.0609259 |
| C | 9.8906302   | 2.8516889  | 0.0609689 |
| C | 9.9112066   | 1.4562129  | 0.0598611 |
| C | 8.6636072   | 0.7220866  | 0.0586772 |
| C | 8.6653072   | -0.6994899 | 0.0576262 |
| C | 7.4303680   | -1.4212286 | 0.0565036 |
| C | 7.4294331   | -2.8490168 | 0.0554351 |
| C | 6.1957896   | -3.5672400 | 0.0542296 |
| C | 6.1922811   | -4.9950329 | 0.0532145 |
| C | 4.9573246   | -5.7116903 | 0.0521046 |
| C | 4.9503059   | -7.1423603 | 0.0510974 |
| C | 3.7188143   | -7.8535438 | 0.0499535 |

---

|   |            |            |           |
|---|------------|------------|-----------|
| C | 2.4776175  | -7.1433683 | 0.0497861 |
| C | 1.2391962  | -7.8555405 | 0.0485988 |
| C | 0.0021050  | -7.1446757 | 0.0484399 |
| C | -1.2381438 | -7.8540987 | 0.0473610 |
| C | -2.4737544 | -7.1402809 | 0.0472479 |
| C | -3.7202271 | -7.8448162 | 0.0460845 |
| C | -4.9491748 | -7.1289456 | 0.0459971 |
| C | -4.9394768 | -5.7039349 | 0.0470416 |
| C | -6.1664259 | -4.9822108 | 0.0469458 |
| C | -6.1542367 | -3.5650071 | 0.0480464 |
| C | -7.3898544 | -2.8705648 | 0.0481178 |
| C | -7.4053023 | -1.4472620 | 0.0494093 |
| C | -8.6463269 | -0.7466264 | 0.0495453 |
| C | -8.6558372 | 0.6755175  | 0.0508068 |
| C | -7.4246563 | 1.4065032  | 0.0519711 |
| C | -7.4290759 | 2.8333791  | 0.0532299 |
| C | -6.1967564 | 3.5565254  | 0.0542982 |
| C | -6.1978720 | 4.9832114  | 0.0555883 |
| C | -3.7329582 | 7.8477883  | 0.0591477 |
| C | -4.9640657 | 5.7033708  | 0.0567593 |
| C | -4.9625214 | 7.1332581  | 0.0580338 |
| C | -1.2523758 | 7.8569155  | 0.0601131 |
| C | -2.4883532 | 7.1419972  | 0.0590193 |
| C | 1.2246465  | 7.8625507  | 0.0611975 |
| C | -0.0120193 | 7.1495323  | 0.0599984 |
| C | 3.7040829  | 7.8653566  | 0.0622610 |
| C | 4.9364585  | 7.1565919  | 0.0621737 |
| C | 2.4637257  | 7.1529555  | 0.0611294 |
| C | 4.9450000  | 5.7261836  | 0.0609610 |
| C | 6.1812895  | 5.0120785  | 0.0608790 |
| C | 6.1874189  | 3.5845552  | 0.0596651 |
| C | 7.4227125  | 2.8688890  | 0.0597073 |
| C | 7.4269912  | 1.4412732  | 0.0586304 |
| C | 6.1887131  | 0.7221955  | 0.0575235 |
| C | 6.1906253  | -0.7043013 | 0.0563986 |
| C | 4.9539052  | -1.4225881 | 0.0551626 |
| C | 4.9542208  | -2.8503246 | 0.0540924 |
| C | 3.7195098  | -3.5660976 | 0.0529774 |
| C | 3.7169380  | -4.9969158 | 0.0519536 |
| C | 2.4820433  | -5.7110937 | 0.0507948 |
| C | 1.2439277  | -4.9969567 | 0.0506504 |
| C | 0.0075137  | -5.7106060 | 0.0494431 |



---

|   |            |            |           |
|---|------------|------------|-----------|
| C | -1.2260823 | -4.9963067 | 0.0493450 |
| C | -2.4661028 | -5.7090663 | 0.0482592 |
| C | -3.6968515 | -4.9942251 | 0.0482271 |
| C | -3.6905014 | -3.5658805 | 0.0493117 |
| C | -4.9192146 | -2.8494543 | 0.0492695 |
| C | -4.9292728 | -1.4273225 | 0.0505023 |
| C | -6.1715512 | -0.7221576 | 0.0505986 |
| C | -6.1792542 | 0.7009804  | 0.0518074 |
| C | -4.9441592 | 1.4222876  | 0.0528888 |
| C | -4.9499792 | 2.8476225  | 0.0541348 |
| C | -2.4855202 | 5.7105758  | 0.0577521 |
| C | -3.7158999 | 3.5653284  | 0.0553238 |
| C | -3.7193268 | 4.9944946  | 0.0566138 |
| C | -0.0079113 | 5.7160090  | 0.0587276 |
| C | -1.2429866 | 5.0008439  | 0.0576308 |
| C | 2.4687501  | 5.7209960  | 0.0598733 |
| C | 3.7052892  | 5.0095360  | 0.0598486 |
| C | 1.2305054  | 5.0053118  | 0.0586390 |
| C | 3.7101405  | 3.5791030  | 0.0586140 |
| C | 4.9468147  | 2.8657628  | 0.0585598 |
| C | 4.9502431  | 1.4382176  | 0.0574555 |
| C | 3.7144155  | 0.7216060  | 0.0562632 |
| C | 3.7167064  | -0.7076864 | 0.0550980 |
| C | 2.4819338  | -1.4234808 | 0.0539714 |
| C | 2.4827086  | -2.8517059 | 0.0528859 |
| C | 1.2466607  | -3.5676420 | 0.0517184 |
| C | 0.0119652  | -2.8531494 | 0.0516366 |
| C | -1.2223700 | -3.5677398 | 0.0504399 |
| C | -2.4562428 | -2.8521636 | 0.0504544 |
| C | -2.4604176 | -1.4252238 | 0.0516094 |
| C | -3.6962121 | -0.7115298 | 0.0516475 |
| C | -3.7030022 | 0.7146704  | 0.0528149 |
| C | -1.2386983 | 3.5727047  | 0.0563866 |
| C | -2.4691456 | 1.4300977  | 0.0540001 |
| C | -2.4745821 | 2.8564713  | 0.0552335 |
| C | 1.2350278  | 3.5765619  | 0.0574127 |
| C | 2.4738021  | 2.8633580  | 0.0574192 |
| C | 2.4775411  | 1.4354170  | 0.0562372 |
| C | -0.0000873 | 2.8613444  | 0.0562962 |
| C | 0.0043220  | 1.4323996  | 0.0551122 |
| C | 1.2413523  | 0.7191840  | 0.0551060 |
| C | 1.2445091  | -0.7085927 | 0.0539442 |

---

|   |             |             |           |
|---|-------------|-------------|-----------|
| C | 0.0102657   | -1.4237402  | 0.0527784 |
| C | -1.2253082  | -0.7096248  | 0.0527914 |
| C | -1.2299707  | 0.7173330   | 0.0539551 |
| H | -5.0027127  | 11.0729491  | 0.0613678 |
| H | -0.0216587  | 11.0829562  | 0.0638636 |
| H | 12.0927122  | -1.2201854  | 0.0585781 |
| H | 2.4701638   | 11.0879276  | 0.0647772 |
| H | -10.7749046 | -3.4840690  | 0.0463905 |
| H | 2.4894676   | -11.0786856 | 0.0472298 |
| H | -10.8512800 | 3.3356685   | 0.0525668 |
| H | -8.3721529  | 7.6711231   | 0.0573204 |
| H | -7.1380703  | 9.8318640   | 0.0594717 |
| H | 4.9572514   | 11.0973931  | 0.0652440 |
| H | -12.0605638 | -1.3099510  | 0.0475809 |
| H | -12.0848584 | 1.1550984   | 0.0498017 |
| H | 8.3572446   | -7.6910031  | 0.0526203 |
| H | 7.1163046   | -9.8484800  | 0.0502040 |
| H | 10.8396740  | 3.4001679   | 0.0619668 |
| H | 12.0899556  | 1.2501677   | 0.0609323 |
| H | -5.0102058  | -11.0577314 | 0.0430920 |
| H | 8.3424708   | 7.7112132   | 0.0643480 |
| H | 9.6034126   | -5.5320639  | 0.0549712 |
| H | -9.6124334  | 5.5070326   | 0.0551021 |
| H | -7.1364656  | -9.8102337  | 0.0427707 |
| H | 4.9772555   | -11.0832736 | 0.0483282 |
| H | 9.5914599   | 5.5558701   | 0.0632989 |
| H | 10.8473563  | -3.3728964  | 0.0569972 |
| H | 7.0990724   | 9.8659736   | 0.0656655 |
| H | -2.5046743  | -11.0724491 | 0.0446726 |
| H | -8.3829429  | -7.6128770  | 0.0440604 |
| H | -0.0047299  | -11.0779832 | 0.0461123 |
| H | -2.5143299  | 11.0759698  | 0.0625948 |

180

Pyrrolic N d support material

|   |            |            |            |
|---|------------|------------|------------|
| C | 11.1506130 | 0.7125900  | -0.0194519 |
| C | 11.1746853 | -0.6514082 | -0.0176423 |
| C | 9.9545023  | -1.4233761 | -0.0213964 |
| C | 9.9924220  | -2.8153726 | -0.0222664 |
| C | 8.8030558  | -3.5930105 | -0.0321496 |
| C | 8.8254233  | -5.0091871 | -0.0324998 |

---

C 7.6410162 -5.7810781 -0.0451164  
C 7.6272144 -7.2181129 -0.0337680  
C 6.4428557 -7.9694585 -0.0345567  
C 6.3921260 -9.4190158 -0.0100514  
C 5.2039093 -10.1092802 0.0027305  
C 3.9191666 -9.4355006 -0.0072353  
C 2.6802378 -10.0922000 0.0198114  
C 1.4249562 -9.3923768 0.0226630  
C 0.1682756 -10.0387290 0.0616532  
C -1.0507369 -9.3177324 0.0754442  
C -2.3149077 -9.9655723 0.1115114  
C -3.5052574 -9.2431897 0.1253577  
C -4.7798404 -9.9208527 0.1556693  
C -5.9528391 -9.2245062 0.1671231  
C -5.9663434 -7.7809809 0.1523785  
C -7.1625107 -7.0734739 0.1627514  
C -7.1881686 -5.6536813 0.1517664  
C -8.4075197 -4.9475258 0.1606830  
C -8.4504703 -3.5422911 0.1536187  
C -9.6861462 -2.8273889 0.1615551  
C -9.7400783 -1.4351724 0.1575293  
C -10.9869003 -0.7009642 0.1648651  
C -11.0165454 0.6673320 0.1616013  
C -9.8007073 1.4511255 0.1515234  
C -9.8068040 2.8477909 0.1483082  
C -8.6018600 3.6165988 0.1391949  
C -8.5904511 5.0308964 0.1342127  
C -7.3882014 5.7809131 0.1243011  
C -7.3582136 7.2105078 0.1164918  
C -4.9326649 10.0717753 0.0807085  
C -6.1614743 7.9362020 0.1044585  
C -6.1177494 9.3833290 0.0944514  
C -2.4307272 10.0733281 0.0588162  
C -3.6537415 9.3929887 0.0751137  
C 0.0730458 10.0643356 0.0329263  
C -1.1738298 9.3913292 0.0516581  
C 2.5719607 10.0396445 0.0041674  
C 1.3073813 9.3736974 0.0237235  
C 5.0652578 10.0105419 -0.0245297  
C 6.2391748 9.3070453 -0.0335312  
C 3.7822472 9.3425290 -0.0059130  
C 6.2592954 7.8603617 -0.0257165

---

|   |            |            |            |
|---|------------|------------|------------|
| C | 7.4419789  | 7.1237736  | -0.0332592 |
| C | 7.4508613  | 5.6963456  | -0.0261949 |
| C | 8.6504513  | 4.9630385  | -0.0306074 |
| C | 8.6599192  | 3.5541349  | -0.0249491 |
| C | 9.8808390  | 2.8287238  | -0.0256266 |
| C | 9.9030188  | 1.4392376  | -0.0221580 |
| C | 8.6573344  | 0.6987116  | -0.0218515 |
| C | 8.6831861  | -0.7195467 | -0.0246662 |
| C | 7.4596617  | -1.4597188 | -0.0329557 |
| C | 7.5394986  | -2.8895717 | -0.0418823 |
| C | 6.3428749  | -3.6414691 | -0.0626561 |
| C | 6.3810186  | -5.0809702 | -0.0662883 |
| C | 5.1806227  | -5.8489760 | -0.0792063 |
| C | 5.1770827  | -7.2767894 | -0.0558105 |
| C | 3.9439284  | -7.9933075 | -0.0423121 |
| C | 2.7014537  | -7.2891977 | -0.0517494 |
| C | 1.4403201  | -7.9514660 | -0.0116892 |
| C | 0.2087981  | -7.2050504 | 0.0055831  |
| C | -1.0363277 | -7.8719394 | 0.0528030  |
| C | -2.2387307 | -7.0941255 | 0.0743644  |
| C | -3.4872010 | -7.7904235 | 0.1091997  |
| C | -4.7064234 | -7.0654306 | 0.1257110  |
| C | -4.6951043 | -5.6315830 | 0.1162709  |
| C | -5.9383181 | -4.9288366 | 0.1317966  |
| C | -5.9514282 | -3.5039536 | 0.1275250  |
| C | -7.2072957 | -2.8069902 | 0.1392057  |
| C | -7.2533976 | -1.3836699 | 0.1373477  |
| C | -8.5059783 | -0.6829568 | 0.1463907  |
| C | -8.5403290 | 0.7369409  | 0.1445668  |
| C | -7.3204660 | 1.4778672  | 0.1364474  |
| C | -7.3427146 | 2.9065928  | 0.1344608  |
| C | -6.1224221 | 3.6439928  | 0.1269021  |
| C | -6.1312289 | 5.0729623  | 0.1210760  |
| C | -3.6664046 | 7.9470890  | 0.0863238  |
| C | -4.9026794 | 5.8020509  | 0.1103198  |
| C | -4.8989166 | 7.2309536  | 0.1007354  |
| C | -1.1813527 | 7.9489165  | 0.0633976  |
| C | -2.4230747 | 7.2425881  | 0.0814184  |
| C | 1.3005445  | 7.9283440  | 0.0340975  |
| C | 0.0557482  | 7.2333758  | 0.0551481  |
| C | 3.7783449  | 7.8939976  | 0.0023614  |
| C | 4.9947988  | 7.1607274  | -0.0084986 |

---

|   |            |            |            |
|---|------------|------------|------------|
| C | 2.5307090  | 7.2011851  | 0.0225699  |
| C | 4.9830037  | 5.7255625  | -0.0023891 |
| C | 6.1965610  | 4.9803458  | -0.0127594 |
| C | 6.1798672  | 3.5441942  | -0.0093576 |
| C | 7.4112706  | 2.8270588  | -0.0175896 |
| C | 7.4059417  | 1.3990472  | -0.0185565 |
| C | 6.1620336  | 0.6698724  | -0.0166361 |
| C | 6.1835145  | -0.7603217 | -0.0302412 |
| C | 4.9480190  | -1.5010697 | -0.0443394 |
| C | 5.0959856  | -2.9398135 | -0.0740089 |
| C | 3.9479761  | -3.7444039 | -0.1051848 |
| C | 3.9450382  | -5.1627578 | -0.1020989 |
| C | 2.7168207  | -5.8763810 | -0.0882908 |
| C | 1.4831345  | -5.1762146 | -0.0772992 |
| C | 0.2165013  | -5.7745662 | -0.0189710 |
| C | -0.9595062 | -4.9328364 | 0.0221713  |
| C | -2.2142744 | -5.6392163 | 0.0635696  |
| C | -3.4458689 | -4.9119758 | 0.0909748  |
| C | -3.4320463 | -3.4674677 | 0.0932471  |
| C | -4.7093835 | -2.7788812 | 0.1132216  |
| C | -4.7766923 | -1.3545161 | 0.1172176  |
| C | -6.0297731 | -0.6525403 | 0.1280454  |
| C | -6.0722233 | 0.7746647  | 0.1300454  |
| C | -4.8590157 | 1.5139838  | 0.1258594  |
| C | -4.8776763 | 2.9387844  | 0.1241410  |
| C | -2.4271049 | 5.8137305  | 0.0932326  |
| C | -3.6545726 | 3.6708660  | 0.1162790  |
| C | -3.6592261 | 5.0977978  | 0.1075487  |
| C | 0.0518928  | 5.8028884  | 0.0670941  |
| C | -1.1896648 | 5.1028296  | 0.0877501  |
| C | 2.5232856  | 5.7686003  | 0.0310767  |
| C | 3.7420366  | 5.0246135  | 0.0162033  |
| C | 1.2804181  | 5.0807639  | 0.0551273  |
| C | 3.7310737  | 3.5883973  | 0.0202400  |
| C | 4.9349517  | 2.8241197  | 0.0040106  |
| C | 4.9002686  | 1.3733744  | -0.0007824 |
| C | 3.6428405  | 0.6499377  | 0.0110568  |
| C | 3.6338191  | -0.8121053 | -0.0223376 |
| C | 2.4793234  | -1.7181902 | -0.0418418 |
| C | 2.7284232  | -3.0981131 | -0.1008180 |
| C | 1.5256310  | -3.7967662 | -0.0870794 |
| C | 0.4513459  | -2.8960854 | -0.0187197 |

---

|   |             |             |            |
|---|-------------|-------------|------------|
| C | -0.9069116  | -3.4497626  | 0.0290380  |
| C | -2.1809526  | -2.7332192  | 0.0769392  |
| C | -2.2850671  | -1.2710061  | 0.1030116  |
| C | -3.5660224  | -0.6144071  | 0.1138738  |
| C | -3.6155927  | 0.8106328   | 0.1215381  |
| C | -1.1921229  | 3.6839611   | 0.0999595  |
| C | -2.4095561  | 1.5503107   | 0.1196211  |
| C | -2.4205901  | 2.9701776   | 0.1141422  |
| C | 1.2755157   | 3.6523186   | 0.0654063  |
| C | 2.4888029   | 2.9031964   | 0.0447977  |
| C | 2.4247304   | 1.4652702   | 0.0495173  |
| C | 0.0359216   | 2.9709403   | 0.0915603  |
| C | 0.0718664   | 1.5506714   | 0.1047135  |
| N | 1.2191773   | 0.8706077   | 0.0890227  |
| N | 1.0874571   | -1.6554895  | 0.0012683  |
| H | 0.5784337   | -0.7742474  | 0.0667987  |
| N | -1.1709752  | -0.5181288  | 0.1158869  |
| C | -1.1934238  | 0.8155009   | 0.1191033  |
| H | -4.9365327  | 11.1675213  | 0.0730842  |
| H | 0.0818878   | 11.1604166  | 0.0245363  |
| H | 12.1275351  | -1.1922014  | -0.0147272 |
| H | 2.5883772   | 11.1356437  | -0.0030035 |
| H | -10.6200769 | -3.4010234  | 0.1713013  |
| H | 2.6606994   | -11.1881024 | 0.0461848  |
| H | -10.7671140 | 3.3763009   | 0.1529170  |
| H | -9.3469266  | -5.5116391  | 0.1739048  |
| H | -8.3101677  | 7.7541615   | 0.1191883  |
| H | -7.0677862  | 9.9292522   | 0.0976037  |
| H | 5.0792604   | 11.1060805  | -0.0307975 |
| H | -11.9220158 | -1.2720821  | 0.1731876  |
| H | -11.9752445 | 1.1979064   | 0.1670556  |
| H | 8.5893828   | -7.7437651  | -0.0177209 |
| H | 7.3390506   | -9.9706560  | 0.0016254  |
| H | 10.8259532  | 3.3833430   | -0.0283832 |
| H | 12.0830991  | 1.2876430   | -0.0183986 |
| H | -4.7816818  | -11.0162382 | 0.1678285  |
| H | 8.4033375   | 7.6501317   | -0.0448791 |
| H | 9.7967764   | -5.5169609  | -0.0203960 |
| H | -9.5471702  | 5.5658669   | 0.1373725  |
| H | -6.9140967  | -9.7493701  | 0.1884230  |
| H | 5.2145227   | -11.2049471 | 0.0244968  |
| H | 9.6063430   | 5.4988505   | -0.0382426 |

---

|   |            |             |            |
|---|------------|-------------|------------|
| H | 10.9630400 | -3.3245321  | -0.0170246 |
| H | 7.1984595  | 9.8362190   | -0.0472399 |
| H | -2.3533076 | -11.0607523 | 0.1268535  |
| H | -8.1128215 | -7.6189131  | 0.1804668  |
| H | 0.1283455  | -11.1337752 | 0.0840501  |
| H | -2.4319638 | 11.1695780  | 0.0502493  |

182

Pyrrolic N e support material

|   |             |             |            |
|---|-------------|-------------|------------|
| C | 11.1410816  | 0.7165895   | -0.3902491 |
| C | 11.1650832  | -0.6451233  | -0.3021910 |
| C | 9.9465326   | -1.4129319  | -0.1931470 |
| C | 9.9796527   | -2.8027385  | -0.1137118 |
| C | 8.7873540   | -3.5722059  | -0.0340927 |
| C | 8.8038549   | -4.9858250  | 0.0282197  |
| C | 7.6163232   | -5.7479112  | 0.0767747  |
| C | 7.6005653   | -7.1814614  | 0.1308488  |
| C | 6.4144481   | -7.9250156  | 0.1590275  |
| C | 6.3672231   | -9.3729798  | 0.2061688  |
| C | 5.1803433   | -10.0625728 | 0.2200975  |
| C | 3.8982131   | -9.3869458  | 0.1886077  |
| C | 2.6647433   | -10.0494400 | 0.1889198  |
| C | 1.4105981   | -9.3536901  | 0.1498520  |
| C | 0.1598934   | -10.0083112 | 0.1300331  |
| C | -1.0610556  | -9.2944425  | 0.0820492  |
| C | -2.3211404  | -9.9496970  | 0.0312259  |
| C | -3.5134249  | -9.2333866  | -0.0346272 |
| C | -4.7855515  | -9.9126045  | -0.1146409 |
| C | -5.9580569  | -9.2182994  | -0.1900337 |
| C | -5.9748518  | -7.7745507  | -0.1811912 |
| C | -7.1670685  | -7.0627771  | -0.2538417 |
| C | -7.1917230  | -5.6424861  | -0.2193306 |
| C | -8.4057656  | -4.9298215  | -0.2854988 |
| C | -8.4424712  | -3.5259910  | -0.2293155 |
| C | -9.6710456  | -2.8043232  | -0.2978662 |
| C | -9.7172697  | -1.4147611  | -0.2304784 |
| C | -10.9582695 | -0.6756586  | -0.3030672 |
| C | -10.9825793 | 0.6901715   | -0.2388505 |
| C | -9.7677457  | 1.4610430   | -0.0932438 |
| C | -9.7716050  | 2.8541023   | -0.0388463 |
| C | -8.5684191  | 3.6108178   | 0.0925412  |
| C | -8.5588820  | 5.0211144   | 0.1117135  |

---

|   |            |            |            |
|---|------------|------------|------------|
| C | -7.3582724 | 5.7629196  | 0.2028709  |
| C | -7.3330195 | 7.1890762  | 0.1769258  |
| C | -4.9167593 | 10.0443197 | 0.1429752  |
| C | -6.1383849 | 7.9118227  | 0.2131422  |
| C | -6.1003199 | 9.3565914  | 0.1537830  |
| C | -2.4231822 | 10.0421435 | 0.1304609  |
| C | -3.6418660 | 9.3624067  | 0.1897550  |
| C | 0.0661238  | 10.0327374 | 0.0261339  |
| C | -1.1713006 | 9.3579865  | 0.1421912  |
| C | 2.5465840  | 10.0112966 | -0.1658333 |
| C | 1.2955685  | 9.3422630  | -0.0084704 |
| C | 5.0225017  | 9.9893663  | -0.4079645 |
| C | 6.1955993  | 9.2910479  | -0.4874909 |
| C | 3.7536910  | 9.3173768  | -0.2358931 |
| C | 6.2239977  | 7.8475420  | -0.4049394 |
| C | 7.4068187  | 7.1181688  | -0.4872153 |
| C | 7.4262080  | 5.6941106  | -0.4076451 |
| C | 8.6264389  | 4.9661830  | -0.4788503 |
| C | 8.6452846  | 3.5592558  | -0.4011892 |
| C | 9.8662429  | 2.8339260  | -0.4507652 |
| C | 9.8953816  | 1.4464927  | -0.3661185 |
| C | 8.6542898  | 0.7091653  | -0.2489766 |
| C | 8.6777552  | -0.7067269 | -0.1724127 |
| C | 7.4538089  | -1.4407434 | -0.0824918 |
| C | 7.5254684  | -2.8673506 | -0.0308509 |
| C | 6.3233725  | -3.6102287 | 0.0105219  |
| C | 6.3567903  | -5.0441857 | 0.0596372  |
| C | 5.1506716  | -5.8010936 | 0.0864600  |
| C | 5.1496777  | -7.2286079 | 0.1340511  |
| C | 3.9189614  | -7.9438077 | 0.1485356  |
| C | 2.6774758  | -7.2380960 | 0.1155029  |
| C | 1.4225132  | -7.9113560 | 0.1176621  |
| C | 0.1924506  | -7.1724874 | 0.0826669  |
| C | -1.0485795 | -7.8492756 | 0.0701610  |
| C | -2.2533058 | -7.0808362 | 0.0318381  |
| C | -3.4983272 | -7.7813896 | -0.0292559 |
| C | -4.7180001 | -7.0604651 | -0.0925809 |
| C | -4.7081035 | -5.6290637 | -0.0615767 |
| C | -5.9458630 | -4.9215525 | -0.1055883 |
| C | -5.9548660 | -3.4982287 | -0.0287753 |
| C | -7.2024931 | -2.7972783 | -0.0896889 |
| C | -7.2376737 | -1.3768230 | -0.0107813 |



---

|   |            |            |            |
|---|------------|------------|------------|
| C | -8.4845802 | -0.6726412 | -0.0811749 |
| C | -8.5120302 | 0.7430392  | -0.0091485 |
| C | -7.2932843 | 1.4730878  | 0.1464957  |
| C | -7.3149576 | 2.8978957  | 0.1951992  |
| C | -6.0965025 | 3.6253150  | 0.3231102  |
| C | -6.1064040 | 5.0526027  | 0.3076667  |
| C | -3.6495202 | 7.9192632  | 0.2835975  |
| C | -4.8790902 | 5.7773623  | 0.3648862  |
| C | -4.8794548 | 7.2044577  | 0.2955178  |
| C | -1.1725708 | 7.9196079  | 0.2577696  |
| C | -2.4088916 | 7.2126819  | 0.3400317  |
| C | 1.2956928  | 7.9011155  | 0.1047335  |
| C | 0.0625655  | 7.2040494  | 0.2586459  |
| C | 3.7567364  | 7.8715876  | -0.1412786 |
| C | 4.9714878  | 7.1457235  | -0.2285402 |
| C | 2.5216648  | 7.1759669  | 0.0408571  |
| C | 4.9667086  | 5.7142851  | -0.1466334 |
| C | 6.1816380  | 4.9792015  | -0.2404214 |
| C | 6.1735832  | 3.5486818  | -0.1672818 |
| C | 7.4041248  | 2.8351123  | -0.2594142 |
| C | 7.4064793  | 1.4099174  | -0.2026756 |
| C | 6.1690584  | 0.6847402  | -0.0888460 |
| C | 6.1820257  | -0.7406722 | -0.0540304 |
| C | 4.9405658  | -1.4724545 | -0.0211913 |
| C | 5.0748427  | -2.9062322 | -0.0113183 |
| C | 3.9146615  | -3.6914219 | -0.0075004 |
| C | 3.9151674  | -5.1090166 | 0.0512138  |
| C | 2.6872945  | -5.8225740 | 0.0656129  |
| C | 1.4549664  | -5.1205744 | 0.0211903  |
| C | 0.1986230  | -5.7395695 | 0.0459560  |
| C | -0.9805894 | -4.9127240 | 0.0483468  |
| C | -2.2312392 | -5.6291614 | 0.0448176  |
| C | -3.4636461 | -4.9121409 | 0.0237835  |
| C | -3.4525877 | -3.4763168 | 0.1324220  |
| C | -4.7192334 | -2.7791503 | 0.1189279  |
| C | -4.7691048 | -1.3584318 | 0.2248297  |
| C | -6.0160551 | -0.6544368 | 0.1508474  |
| C | -6.0491826 | 0.7679989  | 0.2443242  |
| C | -4.8361822 | 1.4936952  | 0.4314926  |
| C | -4.8564289 | 2.9173530  | 0.4501526  |
| C | -2.4078539 | 5.7859010  | 0.4551244  |
| C | -3.6319912 | 3.6437661  | 0.5475047  |

---

|   |             |             |            |
|---|-------------|-------------|------------|
| C | -3.6383887  | 5.0707466   | 0.4679582  |
| C | 0.0654994   | 5.7772238   | 0.3971384  |
| C | -1.1701807  | 5.0741667   | 0.5210417  |
| C | 2.5195836   | 5.7467446   | 0.1501421  |
| C | 3.7370489   | 5.0124541   | 0.0420096  |
| C | 1.2917178   | 5.0541633   | 0.3639782  |
| C | 3.7321913   | 3.5810793   | 0.1283179  |
| C | 4.9396886   | 2.8328820   | 0.0082240  |
| C | 4.9181275   | 1.3872727   | 0.0352497  |
| C | 3.6764684   | 0.6716658   | 0.2001798  |
| C | 3.6338220   | -0.7756366  | 0.0103426  |
| C | 2.4591882   | -1.6519016  | -0.1354755 |
| C | 2.6925276   | -3.0310782  | -0.0863792 |
| C | 1.4849111   | -3.7328099  | -0.0723400 |
| C | 0.4014342   | -2.8476284  | -0.1115413 |
| C | -0.9385147  | -3.4322272  | 0.0636772  |
| C | -2.2134849  | -2.7504112  | 0.2685926  |
| C | -2.3172680  | -1.3376011  | 0.6106357  |
| C | -3.5627272  | -0.6371135  | 0.4621159  |
| C | -3.5980907  | 0.7860482   | 0.5818510  |
| C | -1.1670404  | 3.6586853   | 0.6792632  |
| C | -2.3919893  | 1.5178367   | 0.7816853  |
| C | -2.4014099  | 2.9413494   | 0.6930090  |
| C | 1.2958111   | 3.6293792   | 0.5266616  |
| C | 2.5123668   | 2.8925502   | 0.3929142  |
| C | 2.5066828   | 1.4648957   | 0.5547411  |
| C | 0.0662363   | 2.9461176   | 0.7537021  |
| C | 0.0879474   | 1.5433208   | 1.0455849  |
| C | 1.3277944   | 0.8865240   | 1.0682345  |
| H | 1.3771823   | -0.1379458  | 1.4279402  |
| N | 1.0351109   | -1.5720490  | -0.2395703 |
| H | 0.5283097   | -0.7026633  | -0.3850322 |
| C | -1.2224602  | -0.5953350  | 1.0982353  |
| H | -0.3512378  | -1.1426945  | 1.4485969  |
| C | -1.1794509  | 0.8068839   | 1.0605440  |
| H | -4.9161607  | 11.1385642  | 0.0874124  |
| H | 0.0685363   | 11.1253333  | -0.0598400 |
| H | 12.1168422  | -1.1876421  | -0.3176005 |
| H | 2.5519354   | 11.1045818  | -0.2435611 |
| H | -10.6040026 | -3.3690942  | -0.4065976 |
| H | 2.6488295   | -11.1453208 | 0.2153404  |
| H | -10.7250365 | 3.3902910   | -0.1091750 |

---

|   |             |             |            |
|---|-------------|-------------|------------|
| H | -9.3448918  | -5.4865749  | -0.3792954 |
| H | -8.2839430  | 7.7298313   | 0.1072868  |
| H | -7.0520640  | 9.8973282   | 0.1068448  |
| H | 5.0240528   | 11.0828867  | -0.4755717 |
| H | -11.8903521 | -1.2406996  | -0.4146282 |
| H | -11.9341057 | 1.2301172   | -0.2993411 |
| H | 8.5610025   | -7.7100000  | 0.1456945  |
| H | 7.3155813   | -9.9215908  | 0.2286323  |
| H | 10.8065616  | 3.3880164   | -0.5493133 |
| H | 12.0726228  | 1.2864846   | -0.4779250 |
| H | -4.7858616  | -11.0081098 | -0.1180693 |
| H | 8.3580781   | 7.6468836   | -0.6167393 |
| H | 9.7717664   | -5.5001278  | 0.0301459  |
| H | -9.5105386  | 5.5591653   | 0.0333261  |
| H | -6.9158736  | -9.7458004  | -0.2555795 |
| H | 5.1879894   | -11.1578899 | 0.2535448  |
| H | 9.5740365   | 5.5043303   | -0.5937288 |
| H | 10.9469629  | -3.3180144  | -0.1243038 |
| H | 7.1462684   | 9.8194841   | -0.6187956 |
| H | -2.3528430  | -11.0452195 | 0.0327569  |
| H | -8.1161015  | -7.6052530  | -0.3312044 |
| H | 0.1274096   | -11.1037393 | 0.1439681  |
| H | -2.4236167  | 11.1354801  | 0.0527499  |

178

Pyrrolic N f support material

|   |            |            |            |
|---|------------|------------|------------|
| C | 11.1484066 | 0.7037482  | -0.1095013 |
| C | 11.1505226 | -0.6648561 | -0.1097149 |
| C | 9.9221142  | -1.4264880 | -0.0463485 |
| C | 9.9038604  | -2.8220852 | -0.0672519 |
| C | 8.6875387  | -3.5681990 | -0.0186653 |
| C | 8.6593142  | -4.9801910 | -0.0660323 |
| C | 7.4498975  | -5.7099670 | -0.0381150 |
| C | 7.4106435  | -7.1355591 | -0.1120792 |
| C | 6.2106760  | -7.8484512 | -0.1088171 |
| C | 6.1639077  | -9.2914140 | -0.2044073 |
| C | 4.9770974  | -9.9726275 | -0.2236210 |
| C | 3.7055611  | -9.2865861 | -0.1456513 |
| C | 2.4853153  | -9.9630506 | -0.1891827 |
| C | 1.2323305  | -9.2802597 | -0.1218449 |
| C | -0.0075256 | -9.9541047 | -0.2014480 |
| C | -1.2435969 | -9.2683616 | -0.1506318 |

---

|   |             |            |            |
|---|-------------|------------|------------|
| C | -2.5026165  | -9.9336052 | -0.2724913 |
| C | -3.7178242  | -9.2431315 | -0.2454837 |
| C | -4.9992149  | -9.8981786 | -0.4054901 |
| C | -6.1778931  | -9.1983918 | -0.4047880 |
| C | -6.2138880  | -7.7619962 | -0.2291026 |
| C | -7.4071543  | -7.0251741 | -0.2531359 |
| C | -7.4391418  | -5.6065402 | -0.0714982 |
| C | -8.6401307  | -4.8327432 | -0.1487892 |
| C | -8.6625099  | -3.4258182 | 0.0343893  |
| C | -9.8551489  | -2.5797052 | -0.1487532 |
| C | -9.7495003  | -1.1921703 | 0.0235873  |
| N | -10.5370423 | -0.0145099 | -0.1746482 |
| H | -11.4957832 | -0.0158521 | -0.5098131 |
| C | -9.7532905  | 1.1654669  | 0.0246628  |
| C | -9.8633560  | 2.5528238  | -0.1464807 |
| C | -8.6733833  | 3.4025648  | 0.0372453  |
| C | -8.6554318  | 4.8097138  | -0.1449690 |
| C | -7.4568433  | 5.5872501  | -0.0673478 |
| C | -7.4293141  | 7.0060905  | -0.2482562 |
| C | -5.0303002  | 9.8865446  | -0.4004211 |
| C | -6.2383051  | 7.7465952  | -0.2242448 |
| C | -6.2068199  | 9.1831506  | -0.3994497 |
| C | -2.5338434  | 9.9296279  | -0.2683931 |
| C | -3.7468497  | 9.2353970  | -0.2410908 |
| C | -0.0389284  | 9.9578900  | -0.1981621 |
| C | -1.2727672  | 9.2682747  | -0.1471341 |
| C | 2.4537614   | 9.9747278  | -0.1864086 |
| C | 1.2030033   | 9.2879532  | -0.1189890 |
| C | 4.9454579   | 9.9922760  | -0.2210382 |
| C | 6.1344529   | 9.3148743  | -0.2019803 |
| C | 3.6761226   | 9.3021610  | -0.1431150 |
| C | 6.1858154   | 7.8720484  | -0.1066368 |
| C | 7.3880807   | 7.1629446  | -0.1100379 |
| C | 7.4318804   | 5.7374228  | -0.0363938 |
| C | 8.6436429   | 5.0114242  | -0.0645024 |
| C | 8.6763304   | 3.5994476  | -0.0175243 |
| C | 9.8950096   | 2.8571176  | -0.0663453 |
| C | 9.9176307   | 1.4615306  | -0.0458721 |
| C | 8.6731776   | 0.7265056  | 0.0334027  |
| C | 8.6754038   | -0.6953940 | 0.0331750  |
| C | 7.4427952   | -1.4180281 | 0.1013097  |
| C | 7.4106435   | -7.1355591 | -0.1120792 |

---

|   |             |            |            |
|---|-------------|------------|------------|
| C | 6.2106760   | -7.8484512 | -0.1088171 |
| C | 6.1639077   | -9.2914140 | -0.2044073 |
| C | 4.9770974   | -9.9726275 | -0.2236210 |
| C | 3.7055611   | -9.2865861 | -0.1456513 |
| C | 2.4853153   | -9.9630506 | -0.1891827 |
| C | 1.2323305   | -9.2802597 | -0.1218449 |
| C | -0.0075256  | -9.9541047 | -0.2014480 |
| C | -1.2435969  | -9.2683616 | -0.1506318 |
| C | -2.5026165  | -9.9336052 | -0.2724913 |
| C | -3.7178242  | -9.2431315 | -0.2454837 |
| C | -4.9992149  | -9.8981786 | -0.4054901 |
| C | -6.1778931  | -9.1983918 | -0.4047880 |
| C | -6.2138880  | -7.7619962 | -0.2291026 |
| C | -7.4071543  | -7.0251741 | -0.2531359 |
| C | -7.4391418  | -5.6065402 | -0.0714982 |
| C | -8.6401307  | -4.8327432 | -0.1487892 |
| C | -8.6625099  | -3.4258182 | 0.0343893  |
| C | -9.8551489  | -2.5797052 | -0.1487532 |
| C | -9.7495003  | -1.1921703 | 0.0235873  |
| N | -10.5370423 | -0.0145099 | -0.1746482 |
| H | -11.4957832 | -0.0158521 | -0.5098131 |
| C | -9.7532905  | 1.1654669  | 0.0246628  |
| C | -9.8633560  | 2.5528238  | -0.1464807 |
| C | -8.6733833  | 3.4025648  | 0.0372453  |
| C | -8.6554318  | 4.8097138  | -0.1449690 |
| C | -7.4568433  | 5.5872501  | -0.0673478 |
| C | -7.4293141  | 7.0060905  | -0.2482562 |
| C | -5.0303002  | 9.8865446  | -0.4004211 |
| C | -6.2383051  | 7.7465952  | -0.2242448 |
| C | -6.2068199  | 9.1831506  | -0.3994497 |
| C | -2.5338434  | 9.9296279  | -0.2683931 |
| C | -3.7468497  | 9.2353970  | -0.2410908 |
| C | -0.0389284  | 9.9578900  | -0.1981621 |
| C | -1.2727672  | 9.2682747  | -0.1471341 |
| C | 2.4537614   | 9.9747278  | -0.1864086 |
| C | 1.2030033   | 9.2879532  | -0.1189890 |
| C | 4.9454579   | 9.9922760  | -0.2210382 |
| C | 6.1344529   | 9.3148743  | -0.2019803 |
| C | 3.6761226   | 9.3021610  | -0.1431150 |
| C | 6.1858154   | 7.8720484  | -0.1066368 |
| C | 7.3880807   | 7.1629446  | -0.1100379 |
| C | 7.4318804   | 5.7374228  | -0.0363938 |

---

|   |            |            |            |
|---|------------|------------|------------|
| C | 8.6436429  | 5.0114242  | -0.0645024 |
| C | 8.6763304  | 3.5994476  | -0.0175243 |
| C | 9.8950096  | 2.8571176  | -0.0663453 |
| C | 9.9176307  | 1.4615306  | -0.0458721 |
| C | 8.6731776  | 0.7265056  | 0.0334027  |
| C | 8.6754038  | -0.6953940 | 0.0331750  |
| C | 7.4427952  | -1.4180281 | 0.1013097  |
| C | 7.4403729  | -2.8457734 | 0.0725247  |
| C | 6.2075656  | -3.5645482 | 0.1204706  |
| C | 6.2009906  | -4.9911564 | 0.0586541  |
| C | 4.9654739  | -5.7071564 | 0.0778888  |
| C | 4.9545587  | -7.1349957 | -0.0153910 |
| C | 3.7218053  | -7.8434716 | -0.0289837 |
| C | 2.4826971  | -7.1349716 | 0.0623319  |
| C | 1.2420514  | -7.8424904 | 0.0197422  |
| C | 0.0066569  | -7.1327648 | 0.1020350  |
| C | -1.2361514 | -7.8337887 | 0.0166732  |
| C | -2.4708453 | -7.1192479 | 0.0775615  |
| C | -3.7179596 | -7.8091605 | -0.0614065 |
| C | -4.9458848 | -7.0886159 | -0.0379076 |
| C | -4.9401336 | -5.6775335 | 0.1634896  |
| C | -6.1714294 | -4.9537534 | 0.1708381  |
| C | -6.1569230 | -3.5540713 | 0.3919081  |
| C | -7.3798494 | -2.8286411 | 0.3609190  |
| C | -7.3126058 | -1.4391174 | 0.5694975  |
| C | -8.4822399 | -0.7008136 | 0.4310495  |
| C | -8.4844416 | 0.6778106  | 0.4316796  |
| C | -7.3171450 | 1.4197267  | 0.5707125  |
| C | -7.3887853 | 2.8092094  | 0.3632326  |
| C | -6.1681293 | 3.5384977  | 0.3945984  |
| C | -6.1870296 | 4.9382788  | 0.1743950  |
| C | -3.7424969 | 7.8014173  | -0.0573797 |
| C | -4.9579906 | 5.6659274  | 0.1671367  |
| C | -4.9681632 | 7.0770621  | -0.0336954 |
| C | -1.2608179 | 7.8337464  | 0.0198626  |
| C | -2.4932289 | 7.1153420  | 0.0809657  |
| C | 1.2172674  | 7.8502414  | 0.0223242  |
| C | -0.0158422 | 7.1366036  | 0.1047193  |
| C | 3.6969499  | 7.8591059  | -0.0267149 |
| C | 4.9319514  | 7.1545474  | -0.0133344 |
| C | 2.4601134  | 7.1466412  | 0.0645686  |
| C | 4.9474099  | 5.7267085  | 0.0796103  |

---

|   |            |            |           |
|---|------------|------------|-----------|
| C | 6.1852033  | 5.0145951  | 0.0601693 |
| C | 6.1963055  | 3.5879573  | 0.1215830 |
| C | 7.4313848  | 2.8730461  | 0.0734219 |
| C | 7.4383131  | 1.4452713  | 0.1017664 |
| C | 6.2035530  | 0.7251379  | 0.1873331 |
| C | 6.2058027  | -0.7018003 | 0.1871038 |
| C | 4.9716334  | -1.4214204 | 0.2576623 |
| C | 4.9691566  | -2.8490854 | 0.2190345 |
| C | 3.7348613  | -3.5655705 | 0.2605821 |
| C | 3.7279795  | -4.9944463 | 0.1792328 |
| C | 2.4914241  | -5.7072576 | 0.1801622 |
| C | 1.2556060  | -4.9958037 | 0.2829385 |
| C | 0.0162117  | -5.7060109 | 0.2510581 |
| C | -1.2164492 | -4.9947997 | 0.3452198 |
| C | -2.4611302 | -5.6992464 | 0.2594184 |
| C | -3.6927900 | -4.9860506 | 0.3254879 |
| C | -3.6788960 | -3.5695900 | 0.5142841 |
| C | -4.9089526 | -2.8569357 | 0.5752391 |
| C | -4.8773115 | -1.4391696 | 0.7271254 |
| C | -6.0970387 | -0.7195291 | 0.7355504 |
| C | -6.0992897 | 0.7038752  | 0.7361262 |
| C | -4.8818283 | 1.4273932  | 0.7281911 |
| C | -4.9179371 | 2.8451715  | 0.5772900 |
| C | -2.4790502 | 5.6953338  | 0.2623715 |
| C | -3.6901144 | 3.5617431  | 0.5165729 |
| C | -3.7084598 | 4.9782557  | 0.3284929 |
| C | -0.0017810 | 5.7098616  | 0.2533574 |
| C | -1.2321712 | 4.9947498  | 0.3475917 |
| C | 2.4733730  | 5.7189410  | 0.1820480 |
| C | 3.7121687  | 5.0100336  | 0.1808185 |
| C | 1.2398258  | 5.0035488  | 0.2847857 |
| C | 3.7235832  | 3.5811464  | 0.2617487 |
| C | 4.9601382  | 2.8685506  | 0.2199464 |
| C | 4.9671283  | 1.4408686  | 0.2581305 |
| C | 3.7357577  | 0.7228464  | 0.3500021 |
| C | 3.7380192  | -0.7073081 | 0.3497608 |
| C | 2.5058174  | -1.4251833 | 0.4182162 |
| C | 2.5014691  | -2.8532744 | 0.3658441 |
| C | 1.2643653  | -3.5699063 | 0.3909162 |
| C | 0.0330450  | -2.8581922 | 0.4977812 |
| C | -1.2051177 | -3.5725792 | 0.4891386 |
| C | -2.4369382 | -2.8602340 | 0.5862681 |

---

|   |             |             |            |
|---|-------------|-------------|------------|
| C | -2.4212217  | -1.4348576  | 0.6903757  |
| C | -3.6477548  | -0.7194979  | 0.7591321  |
| C | -3.6500060  | 0.7115882   | 0.7596198  |
| C | -1.2163618  | 3.5725187   | 0.4909572  |
| C | -2.4257271  | 1.4308657   | 0.6912667  |
| C | -2.4459272  | 2.8562486   | 0.5879603  |
| C | 1.2530937   | 3.5776507   | 0.3923035  |
| C | 2.4924400   | 2.8649189   | 0.3668502  |
| C | 2.5013058   | 1.4368233   | 0.4187292  |
| C | 0.0240315   | 2.8620176   | 0.4990785  |
| C | 0.0366646   | 1.4328916   | 0.5713191  |
| C | 1.2705991   | 0.7185265   | 0.5131220  |
| C | 1.2728565   | -0.7108012  | 0.5128339  |
| C | 0.0411684   | -1.4290677  | 0.5706422  |
| C | -1.1885231  | -0.7148974  | 0.6600971  |
| C | -1.1907743  | 0.7148056   | 0.6604797  |
| H | -5.0435383  | 10.9739547  | -0.5346472 |
| H | -0.0455474  | 11.0475765  | -0.3155080 |
| H | 12.0971234  | -1.2141916  | -0.1635520 |
| H | 2.4481080   | 11.0665102  | -0.2836313 |
| H | -10.7834874 | -3.0665058  | -0.4652846 |
| H | 2.4831753   | -11.0549015 | -0.2866011 |
| H | -10.7932693 | 3.0369698   | -0.4625563 |
| H | -8.3750115  | 7.5346118   | -0.4173855 |
| H | -7.1585373  | 9.7090985   | -0.5350123 |
| H | 4.9354174   | 11.0849934  | -0.3007004 |
| H | 8.3576439   | -7.6828187  | -0.1837042 |
| H | 7.1125641   | -9.8357790  | -0.2682760 |
| H | 10.8418169  | 3.4058354   | -0.1306082 |
| H | 12.0933277  | 1.2560452   | -0.1631905 |
| H | -5.0090443  | -10.9856140 | -0.5400262 |
| H | 8.3334118   | 7.7132560   | -0.1815477 |
| H | 9.6067687   | -5.5264920  | -0.1373420 |
| H | -9.5909782  | 5.3330339   | -0.3764036 |
| H | -7.1279170  | -9.7272209  | -0.5408690 |
| H | 4.9705844   | -11.0653886 | -0.3034423 |
| H | 9.5894677   | 5.5607621   | -0.1356994 |
| H | 10.8522969  | -3.3678010  | -0.1316530 |
| H | 7.0813945   | 9.8622812   | -0.2657690 |
| H | -2.5091836  | -11.0216230 | -0.4060155 |
| H | -8.3511281  | -7.5565183  | -0.4227569 |
| H | -0.0106652  | -11.0438674 | -0.3190788 |



---

H -2.5438565 11.0175873 -0.4016008  
H -9.5739663 -5.3587887 -0.3806492

180

N-O-like support material

C 11.1429698 0.7001442 0.0596548  
C 11.1451594 -0.6682726 0.0586039  
C 9.9149480 -1.4293310 0.0575642  
C 9.8982686 -2.8248448 0.0565484  
C 8.6811614 -3.5707239 0.0554569  
C 8.6563770 -4.9832481 0.0544334  
C 7.4474095 -5.7138810 0.0533746  
C 7.4130945 -7.1411616 0.0523506  
C 6.2147152 -7.8565322 0.0512523  
C 6.1736332 -9.3025940 0.0502003  
C 4.9890450 -9.9877511 0.0491097  
C 3.7151003 -9.3020935 0.0489821  
C 2.4976276 -9.9846294 0.0478842  
C 1.2426794 -9.3030407 0.0476933  
C 0.0062440 -9.9866898 0.0465041  
C -1.2321800 -9.3038795 0.0463097  
C -2.4873883 -9.9844407 0.0450844  
C -3.7066983 -9.3000940 0.0449138  
C -4.9853799 -9.9765155 0.0436320  
C -6.1703941 -9.2868531 0.0435555  
C -6.2069038 -7.8422842 0.0446483  
C -7.4099906 -7.1189597 0.0446188  
C -7.4013322 -5.7062695 0.0457426  
N -8.6235804 -5.0022751 0.0457081  
O -9.7250618 -5.6416036 0.0444949  
C -8.6274268 -3.5919041 0.0469505  
C -9.8577356 -2.8973428 0.0470285  
C -9.8873237 -1.4939453 0.0482470  
C -11.1228098 -0.7442212 0.0483537  
C -11.1325642 0.6268680 0.0495913  
C -9.9102890 1.4006190 0.0508655  
C -9.8983398 2.7987926 0.0521570  
C -8.6840353 3.5500867 0.0533603  
C -8.6612198 4.9640567 0.0546425  
C -7.4535394 5.6975333 0.0558109  
C -7.4214197 7.1252261 0.0570759  
C -5.0026432 9.9762734 0.0604689

---

|   |            |            |           |
|---|------------|------------|-----------|
| C | -6.2241165 | 7.8427497  | 0.0581650 |
| C | -6.1859738 | 9.2889204  | 0.0593633 |
| C | -2.5111440 | 9.9777989  | 0.0614722 |
| C | -3.7273258 | 9.2932259  | 0.0603954 |
| C | -0.0207807 | 9.9845057  | 0.0624235 |
| C | -1.2554593 | 9.2983220  | 0.0613930 |
| C | 2.4693372  | 9.9897846  | 0.0634290 |
| C | 1.2173704  | 9.3041321  | 0.0623529 |
| C | 4.9603412  | 10.0004535 | 0.0643954 |
| C | 6.1467957  | 9.3186910  | 0.0643258 |
| C | 3.6887030  | 9.3108873  | 0.0633533 |
| C | 6.1913811  | 7.8728626  | 0.0631889 |
| C | 7.3918071  | 7.1610095  | 0.0631348 |
| C | 7.4297945  | 5.7340987  | 0.0619910 |
| C | 8.6410263  | 5.0071529  | 0.0619239 |
| C | 8.6698598  | 3.5949174  | 0.0608263 |
| C | 9.8893055  | 2.8527753  | 0.0607824 |
| C | 9.9103787  | 1.4573883  | 0.0596980 |
| C | 8.6630998  | 0.7228941  | 0.0586387 |
| C | 8.6654035  | -0.6985377 | 0.0575836 |
| C | 7.4307012  | -1.4206288 | 0.0564984 |
| C | 7.4306026  | -2.8481906 | 0.0554365 |
| C | 6.1973054  | -3.5669137 | 0.0543749 |
| C | 6.1950429  | -4.9945356 | 0.0533297 |
| C | 4.9608188  | -5.7118438 | 0.0522206 |
| C | 4.9555137  | -7.1425114 | 0.0511706 |
| C | 3.7251743  | -7.8545324 | 0.0500552 |
| C | 2.4830820  | -7.1452751 | 0.0499593 |
| C | 1.2459500  | -7.8584485 | 0.0487835 |
| C | 0.0080514  | -7.1483992 | 0.0486435 |
| C | -1.2308324 | -7.8595816 | 0.0474086 |
| C | -2.4673195 | -7.1471385 | 0.0472564 |
| C | -3.7107836 | -7.8550225 | 0.0460291 |
| C | -4.9422478 | -7.1414872 | 0.0458902 |
| C | -4.9369003 | -5.7146860 | 0.0470119 |
| C | -6.1655034 | -4.9899373 | 0.0469553 |
| C | -6.1543418 | -3.5705529 | 0.0481318 |
| C | -7.3918023 | -2.8749796 | 0.0481612 |
| C | -7.4099960 | -1.4487870 | 0.0494322 |
| C | -8.6509175 | -0.7443430 | 0.0494992 |
| C | -8.6581569 | 0.6788147  | 0.0507938 |
| C | -7.4260647 | 1.4064100  | 0.0520158 |

---

|   |            |            |           |
|---|------------|------------|-----------|
| C | -7.4298613 | 2.8333774  | 0.0532997 |
| C | -6.1971864 | 3.5553285  | 0.0545149 |
| C | -6.1981695 | 4.9823228  | 0.0557611 |
| C | -3.7335743 | 7.8459116  | 0.0591982 |
| C | -4.9646247 | 5.7017305  | 0.0569137 |
| C | -4.9628180 | 7.1319387  | 0.0581115 |
| C | -1.2536630 | 7.8542948  | 0.0602155 |
| C | -2.4893511 | 7.1394823  | 0.0591248 |
| C | 1.2228596  | 7.8600807  | 0.0611783 |
| C | -0.0135824 | 7.1467690  | 0.0601206 |
| C | 3.7018915  | 7.8635829  | 0.0621979 |
| C | 4.9343123  | 7.1552039  | 0.0621257 |
| C | 2.4618160  | 7.1507263  | 0.0611053 |
| C | 4.9429918  | 5.7248159  | 0.0609861 |
| C | 6.1794233  | 5.0112595  | 0.0609358 |
| C | 6.1857422  | 3.5837827  | 0.0598194 |
| C | 7.4213865  | 2.8688107  | 0.0597742 |
| C | 7.4260852  | 1.4413464  | 0.0586649 |
| C | 6.1879435  | 0.7218390  | 0.0575581 |
| C | 6.1904073  | -0.7045461 | 0.0564933 |
| C | 4.9539550  | -1.4232612 | 0.0554359 |
| C | 4.9551078  | -2.8509071 | 0.0543546 |
| C | 3.7207974  | -3.5673015 | 0.0532163 |
| C | 3.7196880  | -4.9979682 | 0.0521534 |
| C | 2.4853412  | -5.7129940 | 0.0510131 |
| C | 1.2462677  | -4.9998049 | 0.0509040 |
| C | 0.0106582  | -5.7144815 | 0.0497246 |
| C | -1.2245219 | -5.0011746 | 0.0496032 |
| C | -2.4634689 | -5.7153625 | 0.0483524 |
| C | -3.6958485 | -5.0007849 | 0.0482299 |
| C | -3.6912336 | -3.5722967 | 0.0493797 |
| C | -4.9229382 | -2.8565353 | 0.0493406 |
| C | -4.9318951 | -1.4321263 | 0.0505768 |
| C | -6.1739168 | -0.7262518 | 0.0506441 |
| C | -6.1815839 | 0.6981794  | 0.0519452 |
| C | -4.9462954 | 1.4187187  | 0.0531780 |
| C | -4.9514546 | 2.8449300  | 0.0544482 |
| C | -2.4867034 | 5.7078604  | 0.0579373 |
| C | -3.7173806 | 3.5622955  | 0.0555989 |
| C | -3.7204748 | 4.9918183  | 0.0568315 |
| C | -0.0096154 | 5.7131480  | 0.0589589 |
| C | -1.2445441 | 4.9977898  | 0.0578375 |

---

|   |             |             |           |
|---|-------------|-------------|-----------|
| C | 2.4668078   | 5.7187049   | 0.0599505 |
| C | 3.7034619   | 5.0076602   | 0.0598737 |
| C | 1.2287983   | 5.0026270   | 0.0588976 |
| C | 3.7084279   | 3.5772559   | 0.0587366 |
| C | 4.9454067   | 2.8645830   | 0.0587017 |
| C | 4.9490735   | 1.4371049   | 0.0575748 |
| C | 3.7134016   | 0.7199840   | 0.0565147 |
| C | 3.7161782   | -0.7092011  | 0.0554158 |
| C | 2.4814630   | -1.4255834  | 0.0542429 |
| C | 2.4831041   | -2.8538324  | 0.0531436 |
| C | 1.2474026   | -3.5703814  | 0.0519783 |
| C | 0.0117337   | -2.8566920  | 0.0518950 |
| C | -1.2226949  | -3.5722316  | 0.0507157 |
| C | -2.4577195  | -2.8573611  | 0.0506364 |
| C | -2.4618024  | -1.4297733  | 0.0518102 |
| C | -3.6986774  | -0.7166983  | 0.0518186 |
| C | -3.7052675  | 0.7101472   | 0.0530840 |
| C | -1.2405409  | 3.5693369   | 0.0566300 |
| C | -2.4710562  | 1.4260363   | 0.0542442 |
| C | -2.4762857  | 2.8528553   | 0.0554883 |
| C | 1.2332774   | 3.5737791   | 0.0577381 |
| C | 2.4722074   | 2.8610531   | 0.0576791 |
| C | 2.4760146   | 1.4330416   | 0.0565137 |
| C | -0.0018455  | 2.8580693   | 0.0565749 |
| C | 0.0025642   | 1.4289674   | 0.0553561 |
| C | 1.2400917   | 0.7164087   | 0.0553350 |
| C | 1.2434219   | -0.7114787  | 0.0541845 |
| C | 0.0093133   | -1.4272631  | 0.0530108 |
| C | -1.2272778  | -0.7139492  | 0.0529889 |
| C | -1.2317386  | 0.7134990   | 0.0541890 |
| H | -5.0020608  | 11.0719077  | 0.0615271 |
| H | -0.0233226  | 11.0805001  | 0.0632556 |
| H | 12.0931098  | -1.2178880  | 0.0585061 |
| H | 2.4674831   | 11.0858812  | 0.0643627 |
| H | -10.7774386 | -3.4872080  | 0.0462224 |
| H | 2.4994462   | -11.0807210 | 0.0471990 |
| H | -10.8509183 | 3.3410956   | 0.0522834 |
| H | -8.3719085  | 7.6711554   | 0.0572479 |
| H | -7.1380720  | 9.8310000   | 0.0593295 |
| H | 4.9541956   | 11.0960620  | 0.0652563 |
| H | -12.0660321 | -1.3011825  | 0.0474400 |
| H | -12.0857749 | 1.1673276   | 0.0496382 |

---

|   |            |             |           |
|---|------------|-------------|-----------|
| H | 8.3628454  | -7.6883880  | 0.0524753 |
| H | 7.1247042  | -9.8464753  | 0.0503421 |
| H | 10.8380968 | 3.4016725   | 0.0617066 |
| H | 12.0891864 | 1.2527346   | 0.0605722 |
| H | -4.9899373 | -11.0721460 | 0.0426595 |
| H | 8.3400385  | 7.7108351   | 0.0640722 |
| H | 9.6064925  | -5.5296454  | 0.0544357 |
| H | -9.6121041 | 5.5090981   | 0.0547372 |
| H | -7.1224004 | -9.8284396  | 0.0427421 |
| H | 4.9863279  | -11.0833744 | 0.0483001 |
| H | 9.5894593  | 5.5564330   | 0.0627748 |
| H | 10.8487992 | -3.3707382  | 0.0566244 |
| H | 7.0964990  | 9.8649368   | 0.0651759 |
| H | -2.4898421 | -11.0805148 | 0.0442442 |
| H | -8.3790624 | -7.6237242  | 0.0438409 |
| H | 0.0070768  | -11.0826695 | 0.0456956 |
| H | -2.5145648 | 11.0738996  | 0.0624480 |

201

Pd<sub>21</sub>/carbon support

|    |            |            |           |
|----|------------|------------|-----------|
| Pd | 1.3343183  | -2.2870989 | 5.5362042 |
| Pd | 0.6375829  | -1.0851538 | 3.1762575 |
| Pd | 0.0047613  | 0.0001066  | 5.7139339 |
| Pd | -0.6310673 | 1.0891022  | 3.1777930 |
| Pd | -1.2159387 | -2.2295213 | 4.7818120 |
| Pd | -2.5322751 | 0.0394780  | 4.7881736 |
| Pd | -0.5556067 | -3.3631808 | 2.3328889 |
| Pd | -2.0664408 | -1.2065933 | 2.4286304 |
| Pd | 3.2058936  | -1.1677826 | 2.3377730 |
| Pd | 2.5414681  | -0.0385520 | 4.7869065 |
| Pd | 2.0736866  | 1.2115474  | 2.4286534 |
| Pd | 1.2246439  | 2.2304959  | 4.7828084 |
| Pd | 1.9812057  | -3.3896349 | 3.0632050 |
| Pd | 0.2182840  | -4.4605055 | 4.6446880 |
| Pd | 3.7768519  | -2.3858219 | 4.6519220 |
| Pd | -1.3242038 | 2.2882715  | 5.5401050 |
| Pd | -3.7679997 | 2.3859608  | 4.6579214 |
| Pd | -0.2089369 | 4.4619776  | 4.6477344 |
| Pd | -3.2003765 | 1.1714703  | 2.3407528 |
| Pd | 0.5600145  | 3.3669536  | 2.3340909 |
| Pd | -1.9752210 | 3.3929695  | 3.0684702 |

---

|   |             |             |            |
|---|-------------|-------------|------------|
| C | 11.1484039  | 0.6982853   | 0.1791168  |
| C | 11.1522968  | -0.6693789  | 0.1240868  |
| C | 9.9234361   | -1.4321144  | 0.0878384  |
| C | 9.9070408   | -2.8265824  | 0.0186441  |
| C | 8.6906757   | -3.5742703  | -0.0238840 |
| C | 8.6653632   | -4.9851265  | -0.1008128 |
| C | 7.4558150   | -5.7169995  | -0.1411884 |
| C | 7.4200833   | -7.1424632  | -0.2036655 |
| C | 6.2201813   | -7.8578951  | -0.2241476 |
| C | 6.1789602   | -9.3030790  | -0.2724625 |
| C | 4.9944400   | -9.9891021  | -0.2706182 |
| C | 3.7203619   | -9.3056312  | -0.2216773 |
| C | 2.5028825   | -9.9904989  | -0.1997970 |
| C | 1.2485954   | -9.3121551  | -0.1372965 |
| C | 0.0122580   | -9.9973618  | -0.0920994 |
| C | -1.2240572  | -9.3174291  | -0.0124286 |
| C | -2.4773691  | -10.0006856 | 0.0377582  |
| C | -3.6951298  | -9.3211653  | 0.1082005  |
| C | -4.9678073  | -10.0078521 | 0.1505302  |
| C | -6.1522477  | -9.3240907  | 0.2055747  |
| C | -6.1954675  | -7.8779834  | 0.2231170  |
| C | -7.3948119  | -7.1637990  | 0.2589000  |
| C | -7.4323142  | -5.7361157  | 0.2614175  |
| C | -8.6431605  | -5.0066839  | 0.2732857  |
| C | -8.6734814  | -3.5936043  | 0.2571735  |
| C | -9.8933918  | -2.8507433  | 0.2495458  |
| C | -9.9161020  | -1.4552128  | 0.2106772  |
| C | -11.1490710 | -0.6982348  | 0.1887802  |
| C | -11.1529499 | 0.6693964   | 0.1330280  |
| C | -9.9240884  | 1.4319376   | 0.0929116  |
| C | -9.9077021  | 2.8262505   | 0.0207208  |
| C | -8.6913414  | 3.5737967   | -0.0242289 |
| C | -8.6660282  | 4.9845596   | -0.1028538 |
| C | -7.4564806  | 5.7164029   | -0.1439317 |
| C | -7.4207639  | 7.1418205   | -0.2076883 |
| C | -4.9952394  | 9.9886621   | -0.2705163 |
| C | -6.2208840  | 7.8573112   | -0.2276038 |
| C | -6.1796692  | 9.3024941   | -0.2761279 |
| C | -2.5039387  | 9.9903876   | -0.1900551 |
| C | -3.7212424  | 9.3053715   | -0.2170303 |
| C | -0.0137045  | 9.9974159   | -0.0723398 |
| C | -1.2497943  | 9.3121573   | -0.1233365 |

---

|   |            |            |            |
|---|------------|------------|------------|
| C | 2.4756835  | 10.0006804 | 0.0633296  |
| C | 1.2225923  | 9.3174176  | 0.0075050  |
| C | 4.9660306  | 10.0077432 | 0.1795063  |
| C | 6.1505783  | 9.3239235  | 0.2316514  |
| C | 3.6935445  | 9.3210653  | 0.1314309  |
| C | 6.1941390  | 7.8777417  | 0.2405019  |
| C | 7.3936507  | 7.1635578  | 0.2708959  |
| C | 7.4313654  | 5.7358726  | 0.2668969  |
| C | 8.6422816  | 5.0064758  | 0.2752473  |
| C | 8.6727231  | 3.5934448  | 0.2542289  |
| C | 9.8926623  | 2.8506454  | 0.2443966  |
| C | 9.9154155  | 1.4551534  | 0.2036434  |
| C | 8.6696805  | 0.7191087  | 0.1794362  |
| C | 8.6741047  | -0.7018704 | 0.1220319  |
| C | 7.4411403  | -1.4266399 | 0.0928280  |
| C | 7.4399951  | -2.8525789 | 0.0120759  |
| C | 6.2065439  | -3.5732423 | -0.0395653 |
| C | 6.2027388  | -4.9997199 | -0.1128182 |
| C | 4.9674733  | -5.7166658 | -0.1417807 |
| C | 4.9611818  | -7.1459553 | -0.1884524 |
| C | 3.7293967  | -7.8594779 | -0.1876790 |
| C | 2.4864248  | -7.1536029 | -0.1413872 |
| C | 1.2499856  | -7.8685045 | -0.1111669 |
| C | 0.0107341  | -7.1619510 | -0.0357862 |
| C | -1.2278070 | -7.8735714 | 0.0201604  |
| C | -2.4651668 | -7.1651010 | 0.1034992  |
| C | -3.7070045 | -7.8742467 | 0.1385332  |
| C | -4.9374642 | -7.1632460 | 0.1947711  |
| C | -4.9452734 | -5.7316643 | 0.2166218  |
| C | -6.1818827 | -5.0150277 | 0.2431363  |
| C | -6.1902318 | -3.5857763 | 0.2413426  |
| C | -7.4259875 | -2.8673864 | 0.2402537  |
| C | -7.4323816 | -1.4383080 | 0.2110372  |
| C | -8.6703472 | -0.7192732 | 0.1846267  |
| C | -8.6747561 | 0.7016658  | 0.1266347  |
| C | -7.4417741 | 1.4262939  | 0.0947820  |
| C | -7.4406603 | 2.8521329  | 0.0124724  |
| C | -6.2071933 | 3.5728370  | -0.0382548 |
| C | -6.2034049 | 4.9992182  | -0.1136235 |
| C | -3.7302090 | 7.8591790  | -0.1845881 |
| C | -4.9681590 | 5.7162098  | -0.1424055 |
| C | -4.9618921 | 7.1454975  | -0.1894035 |

---

|   |            |            |            |
|---|------------|------------|------------|
| C | -1.2510427 | 7.8684253  | -0.1010331 |
| C | -2.4872737 | 7.1534078  | -0.1360106 |
| C | 1.2265975  | 7.8734351  | 0.0333270  |
| C | -0.0117556 | 7.1618277  | -0.0270150 |
| C | 3.7057507  | 7.8740048  | 0.1531403  |
| C | 4.9362500  | 7.1629686  | 0.2084026  |
| C | 2.4640534  | 7.1648354  | 0.1140859  |
| C | 4.9443123  | 5.7313140  | 0.2228497  |
| C | 6.1809955  | 5.0147334  | 0.2467384  |
| C | 6.1894858  | 3.5855019  | 0.2402009  |
| C | 7.4252681  | 2.8671829  | 0.2364019  |
| C | 7.4317135  | 1.4381316  | 0.2058664  |
| C | 6.1963943  | 0.7173236  | 0.1959247  |
| C | 6.2016137  | -0.7110522 | 0.1424639  |
| C | 4.9726983  | -1.4389705 | 0.1165906  |
| C | 4.9660655  | -2.8620522 | -0.0028725 |
| C | 3.7290725  | -3.5787819 | -0.0555242 |
| C | 3.7249330  | -5.0042344 | -0.1127135 |
| C | 2.4868733  | -5.7214793 | -0.1124381 |
| C | 1.2483969  | -5.0157307 | -0.0543751 |
| C | 0.0111069  | -5.7322506 | 0.0000336  |
| C | -1.2264762 | -5.0298594 | 0.1209464  |
| C | -2.4690946 | -5.7338761 | 0.1501847  |
| C | -3.7055223 | -5.0183528 | 0.2041842  |
| C | -3.7157802 | -3.5869012 | 0.2303127  |
| C | -4.9519360 | -2.8682896 | 0.2352147  |
| C | -4.9604422 | -1.4386953 | 0.2287083  |
| C | -6.1970430 | -0.7175437 | 0.2004358  |
| C | -6.2022221 | 0.7107846  | 0.1456110  |
| C | -4.9733220 | 1.4387142  | 0.1204436  |
| C | -4.9667254 | 2.8617041  | -0.0000356 |
| C | -2.4876196 | 5.7212098  | -0.1098339 |
| C | -3.7297315 | 3.5784662  | -0.0532266 |
| C | -3.7256259 | 5.0038737  | -0.1117480 |
| C | -0.0120080 | 5.7320201  | 0.0039682  |
| C | -1.2491499 | 5.0154697  | -0.0524473 |
| C | 2.4681818  | 5.7334839  | 0.1551579  |
| C | 3.7046529  | 5.0179206  | 0.2068284  |
| C | 1.2255612  | 5.0294532  | 0.1246723  |
| C | 3.7150391  | 3.5864722  | 0.2296476  |
| C | 4.9512304  | 2.8679734  | 0.2325846  |
| C | 4.9598175  | 1.4384232  | 0.2251540  |



---

|   |             |             |            |
|---|-------------|-------------|------------|
| C | 3.7293224   | 0.7216790   | 0.2228754  |
| C | 3.7283387   | -0.7194178  | 0.1967735  |
| C | 2.4765004   | -1.4383616  | 0.1063640  |
| C | 2.4877055   | -2.8717356  | 0.0032091  |
| C | 1.2528467   | -3.5873435  | 0.0033812  |
| C | 0.0150527   | -2.8642937  | 0.1094407  |
| C | -1.2316099  | -3.5924475  | 0.2003228  |
| C | -2.4822085  | -2.8753940  | 0.2271277  |
| C | -2.4788583  | -1.4351764  | 0.2380750  |
| C | -3.7300003  | -0.7219907  | 0.2262421  |
| C | -3.7289682  | 0.7191496   | 0.2008545  |
| C | -1.2535132  | 3.5869425   | 0.0039774  |
| C | -2.4771266  | 1.4381321   | 0.1091936  |
| C | -2.4883968  | 2.8714718   | 0.0045928  |
| C | 1.2307332   | 3.5918175   | 0.2007325  |
| C | 2.4814526   | 2.8748343   | 0.2265492  |
| C | 2.4780377   | 1.4346242   | 0.2352621  |
| C | -0.0158156  | 2.8638661   | 0.1088091  |
| C | -0.0069542  | 1.4264775   | 0.0306145  |
| C | 1.2278681   | 0.7113359   | 0.0807675  |
| C | 1.2340961   | -0.7153845  | 0.0303585  |
| C | 0.0062262   | -1.4268158  | 0.0314876  |
| C | -1.2286625  | -0.7116799  | 0.0832084  |
| C | -1.2348656  | 0.7151317   | 0.0317845  |
| H | -4.9935009  | 11.0838380  | -0.3022414 |
| H | -0.0150840  | 11.0932238  | -0.0904762 |
| H | 12.1013816  | -1.2166673  | 0.1040332  |
| H | 2.4762363   | 11.0966806  | 0.0482258  |
| H | -10.8419760 | -3.3996742  | 0.2672646  |
| H | 2.5064857   | -11.0863618 | -0.2222539 |
| H | -10.8589366 | 3.3703247   | -0.0047629 |
| H | -9.5916700  | -5.5556362  | 0.2879371  |
| H | -8.3697633  | 7.6897522   | -0.2328158 |
| H | -7.1304306  | 9.8457063   | -0.3124066 |
| H | 4.9629691   | 11.1033357  | 0.1703658  |
| H | -12.0950626 | -1.2505571  | 0.2154383  |
| H | -12.1020154 | 1.2167896   | 0.1150469  |
| H | 8.3690741   | -7.6904431  | -0.2280818 |
| H | 7.1297666   | -9.8463859  | -0.3060677 |
| H | 10.8412371  | 3.3995851   | 0.2623393  |
| H | 12.0944028  | 1.2507234   | 0.2029979  |
| H | -4.9649567  | -11.1033693 | 0.1347288  |

---

|   |            |             |            |
|---|------------|-------------|------------|
| H | 8.3420592  | 7.7126410   | 0.2919197  |
| H | 9.6154905  | -5.5308628  | -0.1255246 |
| H | -9.6161566 | 5.5302780   | -0.1278868 |
| H | -7.1019603 | -9.8695817  | 0.2340622  |
| H | 4.9926434  | -11.0842663 | -0.3027407 |
| H | 9.5907616  | 5.5554516   | 0.2909345  |
| H | 10.8582766 | -3.3706716  | -0.0065215 |
| H | 7.1001379  | 9.8694580   | 0.2640731  |
| H | -2.4781630 | -11.0965828 | 0.0164343  |
| H | -8.3432902 | -7.7128324  | 0.2780164  |
| H | 0.0134796  | -11.0930987 | -0.1141554 |
| H | -2.5075999 | 11.0862575  | -0.2121149 |

201

Pd<sub>21</sub>/graphitic N support 1

|    |            |            |           |
|----|------------|------------|-----------|
| Pd | 1.3774922  | -2.1917790 | 5.4397412 |
| Pd | 0.6853569  | -1.0086645 | 3.0687411 |
| Pd | 0.0471045  | 0.0768907  | 5.6052649 |
| Pd | -0.5913119 | 1.1878607  | 3.0801510 |
| Pd | -1.1830390 | -2.1591303 | 4.6583653 |
| Pd | -2.4800534 | 0.1243577  | 4.6829453 |
| Pd | -0.4548565 | -3.2849044 | 2.2069638 |
| Pd | -1.9904314 | -1.0735308 | 2.3130869 |
| Pd | 3.2386189  | -1.1426467 | 2.2243548 |
| Pd | 2.5869470  | 0.0460328  | 4.6721319 |
| Pd | 2.1174462  | 1.2623403  | 2.3056349 |
| Pd | 1.2878405  | 2.3111095  | 4.6506865 |
| Pd | 2.0596675  | -3.3479010 | 3.0108264 |
| Pd | 0.2380226  | -4.3762284 | 4.5544578 |
| Pd | 3.8416712  | -2.2825762 | 4.5734045 |
| Pd | -1.2514338 | 2.3733051  | 5.4753561 |
| Pd | -3.6966196 | 2.4747412  | 4.5733112 |
| Pd | -0.1236204 | 4.5282340  | 4.5187142 |
| Pd | -3.1875042 | 1.2828609  | 2.2346023 |
| Pd | 0.5756767  | 3.4316383  | 2.1817589 |
| Pd | -1.9287884 | 3.4933793  | 2.9768098 |
| C  | 11.1296860 | 0.6816862  | 0.3611094 |
| C  | 11.1341854 | -0.6860252 | 0.3072334 |
| C  | 9.9066045  | -1.4474288 | 0.2260937 |
| C  | 9.8908106  | -2.8421665 | 0.1627412 |
| C  | 8.6758514  | -3.5882160 | 0.0769418 |

---

|   |             |             |            |
|---|-------------|-------------|------------|
| C | 8.6527362   | -4.9998103  | 0.0091608  |
| C | 7.4454038   | -5.7306181  | -0.0703830 |
| C | 7.4112646   | -7.1569364  | -0.1195493 |
| C | 6.2125059   | -7.8711153  | -0.1694577 |
| C | 6.1709977   | -9.3167610  | -0.2008167 |
| C | 4.9862502   | -10.0015223 | -0.2207866 |
| C | 3.7124359   | -9.3156710  | -0.2098144 |
| C | 2.4944725   | -9.9975442  | -0.1961032 |
| C | 1.2410881   | -9.3154367  | -0.1593257 |
| C | 0.0061448   | -10.0002956 | -0.1087578 |
| C | -1.2274469  | -9.3165157  | -0.0437305 |
| C | -2.4806389  | -9.9977830  | 0.0223345  |
| C | -3.6971684  | -9.3183321  | 0.0939311  |
| C | -4.9672115  | -10.0057868 | 0.1646878  |
| C | -6.1485941  | -9.3199200  | 0.2359678  |
| C | -6.1891050  | -7.8740526  | 0.2435897  |
| C | -7.3871265  | -7.1638838  | 0.3091588  |
| C | -7.4243511  | -5.7376975  | 0.3086959  |
| C | -8.6311660  | -5.0113481  | 0.3632736  |
| C | -8.6570727  | -3.5983217  | 0.3491940  |
| C | -9.8757264  | -2.8581898  | 0.3856061  |
| C | -9.9004993  | -1.4629203  | 0.3490095  |
| C | -11.1335937 | -0.7072789  | 0.3718760  |
| C | -11.1390296 | 0.6602111   | 0.3178537  |
| C | -9.9119516  | 1.4213461   | 0.2352800  |
| C | -9.8985523  | 2.8170301   | 0.1670532  |
| C | -8.6866729  | 3.5633759   | 0.0759346  |
| C | -8.6660315  | 4.9755656   | 0.0019072  |
| C | -7.4604679  | 5.7061744   | -0.0828193 |
| C | -7.4283213  | 7.1330079   | -0.1322672 |
| C | -5.0080976  | 9.9816869   | -0.2116823 |
| C | -6.2310323  | 7.8490328   | -0.1805881 |
| C | -6.1918843  | 9.2950862   | -0.2034207 |
| C | -2.5169193  | 9.9824817   | -0.1702067 |
| C | -3.7331222  | 9.2980118   | -0.1995807 |
| C | -0.0272746  | 9.9863652   | -0.0601555 |
| C | -1.2614890  | 9.3027058   | -0.1314533 |
| C | 2.4606050   | 9.9872418   | 0.0959450  |
| C | 1.2098029   | 9.3042812   | 0.0093098  |
| C | 4.9486450   | 9.9933966   | 0.2550841  |
| C | 6.1324812   | 9.3094250   | 0.3212168  |
| C | 3.6781791   | 9.3069459   | 0.1690955  |

---

|   |            |            |            |
|---|------------|------------|------------|
| C | 6.1770415  | 7.8634040  | 0.3083588  |
| C | 7.3760164  | 7.1493545  | 0.3644027  |
| C | 7.4148026  | 5.7220664  | 0.3432675  |
| C | 8.6251383  | 4.9921568  | 0.3854549  |
| C | 8.6557992  | 3.5795049  | 0.3539212  |
| C | 9.8746548  | 2.8352219  | 0.3840122  |
| C | 9.8974657  | 1.4399000  | 0.3400634  |
| C | 8.6528936  | 0.7050766  | 0.2668624  |
| C | 8.6577794  | -0.7160982 | 0.2103428  |
| C | 7.4259885  | -1.4393233 | 0.1336390  |
| C | 7.4256218  | -2.8659978 | 0.0594419  |
| C | 6.1941359  | -3.5856155 | -0.0357135 |
| C | 6.1927212  | -5.0125003 | -0.0947550 |
| C | 4.9585880  | -5.7281946 | -0.1557218 |
| C | 4.9534655  | -7.1576465 | -0.1806676 |
| C | 3.7221484  | -7.8693130 | -0.1994240 |
| C | 2.4795499  | -7.1605257 | -0.1895973 |
| C | 1.2419024  | -7.8714262 | -0.1605047 |
| C | 0.0026165  | -7.1601325 | -0.1066877 |
| C | -1.2305598 | -7.8738330 | -0.0376402 |
| C | -2.4670024 | -7.1632569 | 0.0384171  |
| C | -3.7082118 | -7.8712082 | 0.1023620  |
| C | -4.9323715 | -7.1577180 | 0.1772804  |
| C | -4.9390735 | -5.7246516 | 0.1835223  |
| C | -6.1736994 | -5.0164629 | 0.2454838  |
| C | -6.1732561 | -3.5925582 | 0.2425266  |
| C | -7.4090858 | -2.8738589 | 0.2882819  |
| C | -7.4198659 | -1.4462885 | 0.2600399  |
| C | -8.6563755 | -0.7294082 | 0.2794727  |
| C | -8.6627736 | 0.6935282  | 0.2221997  |
| C | -7.4329074 | 1.4174214  | 0.1443747  |
| C | -7.4360992 | 2.8423768  | 0.0598688  |
| C | -6.2057829 | 3.5609954  | -0.0448225 |
| C | -6.2066589 | 4.9884934  | -0.1102869 |
| C | -3.7414371 | 7.8506587  | -0.2047255 |
| C | -4.9747820 | 5.7063285  | -0.1761951 |
| C | -4.9708893 | 7.1374376  | -0.1945705 |
| C | -1.2620425 | 7.8586420  | -0.1521997 |
| C | -2.4973029 | 7.1437311  | -0.1985271 |
| C | 1.2141996  | 7.8610459  | -0.0029411 |
| C | -0.0228598 | 7.1507999  | -0.0971750 |
| C | 3.6908709  | 7.8601514  | 0.1609934  |

---

|   |            |            |            |
|---|------------|------------|------------|
| C | 4.9212980  | 7.1488483  | 0.2304966  |
| C | 2.4513954  | 7.1510487  | 0.0799105  |
| C | 4.9298994  | 5.7179315  | 0.2196675  |
| C | 6.1660074  | 5.0013812  | 0.2717112  |
| C | 6.1750152  | 3.5727222  | 0.2472503  |
| C | 7.4094290  | 2.8540084  | 0.2840823  |
| C | 7.4159513  | 1.4248879  | 0.2457130  |
| C | 6.1813409  | 0.7051455  | 0.1824330  |
| C | 6.1871755  | -0.7230304 | 0.1305049  |
| C | 4.9584199  | -1.4504529 | 0.0587916  |
| C | 4.9528411  | -2.8744258 | -0.0545051 |
| C | 3.7167044  | -3.5887427 | -0.1437025 |
| C | 3.7159419  | -5.0148368 | -0.1749985 |
| C | 2.4794376  | -5.7295158 | -0.1884902 |
| C | 1.2392945  | -5.0210916 | -0.1580416 |
| C | 0.0017999  | -5.7282094 | -0.0958545 |
| C | -1.2381156 | -5.0227060 | 0.0224232  |
| C | -2.4691558 | -5.7364283 | 0.0621316  |
| C | -3.6968315 | -5.0112300 | 0.1245053  |
| C | -3.7030240 | -3.5841009 | 0.1232597  |
| C | -4.9323113 | -2.8729078 | 0.1891498  |
| C | -4.9511041 | -1.4431661 | 0.1971332  |
| C | -6.1843760 | -0.7255538 | 0.2071651  |
| C | -6.1913938 | 0.7027938  | 0.1508286  |
| C | -4.9640091 | 1.4237624  | 0.0736817  |
| C | -4.9649361 | 2.8495071  | -0.0619515 |
| C | -2.4963029 | 5.7116901  | -0.2157107 |
| C | -3.7346855 | 3.5669574  | -0.1658753 |
| C | -3.7328836 | 4.9937221  | -0.2024878 |
| C | -0.0234393 | 5.7207564  | -0.1117182 |
| C | -1.2571547 | 5.0046384  | -0.1964075 |
| C | 2.4562122  | 5.7198704  | 0.0862334  |
| C | 3.6914894  | 5.0045092  | 0.1532517  |
| C | 1.2141262  | 5.0149978  | 0.0120254  |
| C | 3.7025415  | 3.5736084  | 0.1492338  |
| C | 4.9377926  | 2.8556896  | 0.1847493  |
| C | 4.9458922  | 1.4271574  | 0.1651211  |
| C | 3.7141306  | 0.7111286  | 0.1159875  |
| C | 3.7123652  | -0.7310318 | 0.0826952  |
| C | 2.4657696  | -1.4485486 | -0.0389326 |
| C | 2.4737643  | -2.8809397 | -0.1237020 |
| C | 1.2382185  | -3.5971049 | -0.1143462 |

---

|   |             |             |            |
|---|-------------|-------------|------------|
| C | -0.0027105  | -2.8678080  | 0.0070970  |
| C | -1.2478927  | -3.5884781  | 0.1267560  |
| N | -2.4892961  | -2.8843723  | 0.0596340  |
| C | -2.4693345  | -1.4635348  | 0.1937520  |
| C | -3.7181447  | -0.7432677  | 0.1742916  |
| C | -3.7154778  | 0.7034160   | 0.1283776  |
| C | -1.2599137  | 3.5739838   | -0.1701754 |
| C | -2.4768810  | 1.4256370   | -0.0334987 |
| C | -2.4923319  | 2.8579443   | -0.1507060 |
| C | 1.2177577   | 3.5760754   | 0.0493315  |
| C | 2.4694215   | 2.8604436   | 0.0988603  |
| C | 2.4637115   | 1.4223807   | 0.0837527  |
| C | -0.0254987  | 2.8487844   | -0.0731717 |
| C | -0.0158397  | 1.4108267   | -0.1474174 |
| C | 1.2193057   | 0.7012824   | -0.0961706 |
| C | 1.2268006   | -0.7247091  | -0.1321877 |
| C | 0.0018466   | -1.4332597  | -0.1065629 |
| C | -1.2338584  | -0.7336041  | -0.0406034 |
| C | -1.2446451  | 0.6969160   | -0.1218815 |
| H | -5.0070381  | 11.0773091  | -0.2195023 |
| H | -0.0288257  | 11.0822643  | -0.0472963 |
| H | 12.0826920  | -1.2344413  | 0.3235864  |
| H | 2.4601136   | 11.0833146  | 0.1052792  |
| H | -10.8219678 | -3.4087552  | 0.4365181  |
| H | 2.4949540   | -11.0935587 | -0.1993372 |
| H | -10.8503580 | 3.3605370   | 0.1805829  |
| H | -9.5792375  | -5.5585451  | 0.4117519  |
| H | -8.3783112  | 7.6795166   | -0.1168965 |
| H | -7.1436286  | 9.8378109   | -0.2045265 |
| H | 4.9446152   | 11.0889911  | 0.2654107  |
| H | -12.0776388 | -1.2602180  | 0.4313097  |
| H | -12.0875841 | 1.2084674   | 0.3342544  |
| H | 8.3602334   | -7.7053226  | -0.1064250 |
| H | 7.1218238   | -9.8611074  | -0.2017964 |
| H | 10.8224800  | 3.3829855   | 0.4391616  |
| H | 12.0747201  | 1.2331055   | 0.4205775  |
| H | -4.9640168  | -11.1012905 | 0.1603136  |
| H | 8.3227604   | 7.6985920   | 0.4227500  |
| H | 9.6026761   | -5.5461875  | 0.0254538  |
| H | -9.6168174  | 5.5203498   | 0.0188309  |
| H | -7.0989641  | -9.8622314  | 0.2885973  |
| H | 4.9833453   | -11.0970067 | -0.2376108 |

---

|   |            |             |            |
|---|------------|-------------|------------|
| H | 9.5724346  | 5.5406099   | 0.4401533  |
| H | 10.8413448 | -3.3878577  | 0.1773896  |
| H | 7.0805394  | 9.8548928   | 0.3844245  |
| H | -2.4815489 | -11.0938692 | 0.0187859  |
| H | -8.3339924 | -7.7133217  | 0.3594539  |
| H | 0.0062581  | -11.0961146 | -0.1098517 |
| H | -2.5207634 | 11.0785385  | -0.1609769 |

201

Pd<sub>21</sub>/graphitic N support 2

|    |            |            |            |
|----|------------|------------|------------|
| Pd | 1.2458595  | -2.5328421 | 5.3325420  |
| Pd | 0.4205627  | -1.5168255 | 2.9165017  |
| Pd | -0.1736112 | -0.3576801 | 5.3986904  |
| Pd | -0.9115059 | 0.6641826  | 2.9027967  |
| Pd | -1.3540387 | -2.6743707 | 4.6090521  |
| Pd | -2.7852848 | -0.4766266 | 4.5454728  |
| Pd | -0.7435233 | -3.9732295 | 2.2269609  |
| Pd | -2.1957168 | -1.7137014 | 2.2000411  |
| Pd | 2.9698599  | -1.4231768 | 1.9755718  |
| Pd | 2.3679382  | -0.2823734 | 4.4047562  |
| Pd | 1.6382254  | 0.8368965  | 2.0442216  |
| Pd | 0.9465617  | 1.9173340  | 4.4655243  |
| Pd | 1.8415921  | -3.7036776 | 2.8242557  |
| Pd | 0.2390972  | -4.8024770 | 4.5507378  |
| Pd | 3.6532868  | -2.5790790 | 4.3069490  |
| Pd | -1.6143362 | 1.7997195  | 5.3035735  |
| Pd | -4.0552878 | 1.8526215  | 4.4072866  |
| Pd | -0.6392605 | 4.0487966  | 4.4346328  |
| Pd | -3.5399432 | 0.6041127  | 2.1179624  |
| Pd | 0.2879254  | 3.0867350  | 2.1076262  |
| Pd | -2.2885276 | 2.8827894  | 2.7880356  |
| C  | 11.1525484 | 0.7162914  | 0.2670158  |
| C  | 11.1583023 | -0.6475198 | 0.1542959  |
| C  | 9.9312597  | -1.4048183 | 0.0389131  |
| C  | 9.9176574  | -2.7965577 | -0.0663386 |
| C  | 8.7034243  | -3.5404676 | -0.1643575 |
| C  | 8.6814620  | -4.9516179 | -0.2312428 |
| C  | 7.4735355  | -5.6825434 | -0.2812320 |
| C  | 7.4393368  | -7.1089353 | -0.2798730 |
| C  | 6.2398604  | -7.8228741 | -0.2527191 |
| C  | 6.1992078  | -9.2675863 | -0.1992660 |
| C  | 5.0156096  | -9.9485979 | -0.1113482 |

---

|   |             |            |            |
|---|-------------|------------|------------|
| C | 3.7443933   | -9.2595761 | -0.0709149 |
| C | 2.5321991   | -9.9374520 | 0.0691789  |
| C | 1.2832668   | -9.2509467 | 0.1354989  |
| C | 0.0537668   | -9.9242057 | 0.3096989  |
| C | -1.1786395  | -9.2364264 | 0.3859605  |
| C | -2.4253124  | -9.9145524 | 0.5400760  |
| C | -3.6416971  | -9.2313147 | 0.5845419  |
| C | -4.9107408  | -9.9137946 | 0.7095052  |
| C | -6.0948096  | -9.2284140 | 0.7259565  |
| C | -6.1395076  | -7.7865655 | 0.6191664  |
| C | -7.3401821  | -7.0756748 | 0.6102946  |
| C | -7.3796391  | -5.6543391 | 0.4922007  |
| C | -8.5920290  | -4.9301733 | 0.4676207  |
| C | -8.6248795  | -3.5236603 | 0.3457966  |
| C | -9.8463824  | -2.7857761 | 0.3210138  |
| C | -9.8720508  | -1.3948132 | 0.2103086  |
| C | -11.1069127 | -0.6412695 | 0.1952363  |
| C | -11.1152686 | 0.7243177  | 0.1058588  |
| C | -9.8884693  | 1.4864391  | 0.0249314  |
| C | -9.8751143  | 2.8809524  | -0.0397533 |
| C | -8.6596810  | 3.6279740  | -0.1020574 |
| C | -8.6350291  | 5.0401904  | -0.1367043 |
| C | -7.4266984  | 5.7726346  | -0.1740500 |
| C | -7.3914831  | 7.1988442  | -0.1742054 |
| C | -4.9647196  | 10.0423181 | -0.1207057 |
| C | -6.1909588  | 7.9121586  | -0.1759595 |
| C | -6.1493459  | 9.3578146  | -0.1536294 |
| C | -2.4744498  | 10.0363750 | -0.0325402 |
| C | -3.6917869  | 9.3556533  | -0.1041328 |
| C | 0.0118326   | 10.0313253 | 0.1207343  |
| C | -1.2227103  | 9.3525628  | 0.0081692  |
| C | 2.4947019   | 10.0216346 | 0.3179245  |
| C | 1.2446722   | 9.3446239  | 0.1871887  |
| C | 4.9771909   | 10.0173381 | 0.5263907  |
| C | 6.1583679   | 9.3293869  | 0.5901951  |
| C | 3.7083413   | 9.3362687  | 0.3902481  |
| C | 6.2006001   | 7.8851453  | 0.5195491  |
| C | 7.3971836   | 7.1680562  | 0.5629938  |
| C | 7.4343884   | 5.7435525  | 0.4754192  |
| C | 8.6440361   | 5.0138062  | 0.4905008  |
| C | 8.6749652   | 3.6049071  | 0.3882528  |
| C | 9.8946607   | 2.8632462  | 0.3861638  |



---

|   |            |            |            |
|---|------------|------------|------------|
| C | 9.9191314  | 1.4720654  | 0.2752915  |
| C | 8.6752651  | 0.7413356  | 0.1611583  |
| C | 8.6812137  | -0.6753152 | 0.0423774  |
| C | 7.4501416  | -1.3949862 | -0.0729452 |
| C | 7.4531040  | -2.8182912 | -0.1780300 |
| C | 6.2216547  | -3.5363874 | -0.2795562 |
| C | 6.2205888  | -4.9639983 | -0.3093125 |
| C | 4.9863188  | -5.6799794 | -0.3173335 |
| C | 4.9816032  | -7.1086373 | -0.2550881 |
| C | 3.7514336  | -7.8154058 | -0.1646851 |
| C | 2.5106731  | -7.1031470 | -0.1362458 |
| C | 1.2826231  | -7.8108399 | 0.0276142  |
| C | 0.0501281  | -7.0973462 | 0.1128787  |
| C | -1.1826270 | -7.7961972 | 0.2957859  |
| C | -2.4174515 | -7.0808730 | 0.3707204  |
| C | -3.6549664 | -7.7874026 | 0.4948394  |
| C | -4.8843996 | -7.0736893 | 0.5107867  |
| C | -4.8939097 | -5.6456348 | 0.4089754  |
| C | -6.1314680 | -4.9346998 | 0.3929360  |
| C | -6.1419054 | -3.5115739 | 0.2750286  |
| C | -7.3791753 | -2.8000329 | 0.2470527  |
| C | -7.3879936 | -1.3770218 | 0.1294839  |
| C | -8.6282777 | -0.6611001 | 0.1148986  |
| C | -8.6385007 | 0.7572355  | 0.0242025  |
| C | -7.4069227 | 1.4797651  | -0.0554107 |
| C | -7.4087769 | 2.9065120  | -0.1178724 |
| C | -6.1775038 | 3.6277238  | -0.1811462 |
| C | -6.1740005 | 5.0542963  | -0.1993877 |
| C | -3.7014958 | 7.9099952  | -0.1521173 |
| C | -4.9377735 | 5.7677348  | -0.2142605 |
| C | -4.9324156 | 7.1978274  | -0.1877927 |
| C | -1.2244142 | 7.9099263  | -0.0580639 |
| C | -2.4600527 | 7.2004849  | -0.1473050 |
| C | 1.2474246  | 7.9018873  | 0.1254474  |
| C | 0.0121593  | 7.1971157  | -0.0093429 |
| C | 3.7186191  | 7.8900631  | 0.3296852  |
| C | 4.9456802  | 7.1754862  | 0.3930582  |
| C | 2.4800305  | 7.1858991  | 0.2011760  |
| C | 4.9521042  | 5.7457013  | 0.3259310  |
| C | 6.1862180  | 5.0271382  | 0.3598350  |
| C | 6.1940480  | 3.6011511  | 0.2688005  |
| C | 7.4294127  | 2.8832992  | 0.2765651  |

---

|   |            |            |            |
|---|------------|------------|------------|
| C | 7.4371154  | 1.4590566  | 0.1670288  |
| C | 6.2031685  | 0.7425447  | 0.0571845  |
| C | 6.2087104  | -0.6800586 | -0.0650526 |
| C | 4.9795869  | -1.4010858 | -0.1788127 |
| C | 4.9812141  | -2.8246257 | -0.3078896 |
| C | 3.7466473  | -3.5415648 | -0.3828798 |
| C | 3.7443960  | -4.9662591 | -0.3470884 |
| C | 2.5064946  | -5.6745506 | -0.2568626 |
| C | 1.2697442  | -4.9598408 | -0.2235384 |
| C | 0.0537919  | -5.6704696 | 0.0164976  |
| C | -1.1780534 | -4.9508396 | 0.1819430  |
| C | -2.4259025 | -5.6537532 | 0.3047809  |
| C | -3.6555868 | -4.9301502 | 0.3192790  |
| C | -3.6667286 | -3.5017751 | 0.2371336  |
| C | -4.9035114 | -2.7937942 | 0.1986027  |
| C | -4.9131879 | -1.3722690 | 0.0968615  |
| C | -6.1528529 | -0.6601707 | 0.0450690  |
| C | -6.1678287 | 0.7659183  | -0.0505302 |
| C | -4.9412154 | 1.4936371  | -0.1216621 |
| C | -4.9365352 | 2.9155988  | -0.2061437 |
| C | -2.4606621 | 5.7698106  | -0.2095500 |
| C | -3.6981668 | 3.6238585  | -0.2615379 |
| C | -3.6957920 | 5.0519462  | -0.2403658 |
| C | 0.0116041  | 5.7676757  | -0.0727335 |
| C | -1.2242278 | 5.0604646  | -0.1962297 |
| C | 2.4814793  | 5.7540702  | 0.1535779  |
| C | 3.7144283  | 5.0365542  | 0.2139339  |
| C | 1.2427531  | 5.0519899  | 0.0315508  |
| C | 3.7219401  | 3.6062774  | 0.1463010  |
| C | 4.9575557  | 2.8876774  | 0.1628780  |
| C | 4.9653516  | 1.4614254  | 0.0644634  |
| C | 3.7373007  | 0.7497003  | -0.0328336 |
| C | 3.7346775  | -0.6851249 | -0.1316875 |
| C | 2.4829649  | -1.4023524 | -0.2753747 |
| C | 2.5011393  | -2.8327933 | -0.3877002 |
| C | 1.2603537  | -3.5287713 | -0.3441790 |
| C | 0.0266871  | -2.7997570 | -0.2711492 |
| C | -1.1716867 | -3.5116588 | 0.0868751  |
| C | -2.4178666 | -2.7819593 | 0.1913619  |
| C | -2.4003998 | -1.3407877 | 0.0912944  |
| C | -3.6749582 | -0.6388195 | 0.0681404  |
| C | -3.6887972 | 0.7869587  | -0.0853044 |

---

|   |             |             |            |
|---|-------------|-------------|------------|
| C | -1.2301124  | 3.6325444   | -0.2413200 |
| C | -2.4429898  | 1.4755233   | -0.2839038 |
| C | -2.4554578  | 2.9079851   | -0.2867337 |
| C | 1.2448390   | 3.6147056   | 0.0206070  |
| C | 2.4915922   | 2.8991553   | 0.0485458  |
| C | 2.4941023   | 1.4654186   | -0.0222939 |
| C | -0.0029672  | 2.8965776   | -0.1455952 |
| C | 0.0042506   | 1.4604748   | -0.2879948 |
| C | 1.2442676   | 0.7477265   | -0.1813246 |
| C | 1.2378471   | -0.6774427  | -0.3486729 |
| C | 0.0092823   | -1.3805676  | -0.3601774 |
| N | -1.2090185  | -0.6602018  | -0.3055039 |
| C | -1.2175952  | 0.7516230   | -0.3349535 |
| H | -4.9618178  | 11.1376943  | -0.0976258 |
| H | 0.0119206   | 11.1262048  | 0.1690308  |
| H | 12.1066829  | -1.1963250  | 0.1520170  |
| H | 2.4957799   | 11.1167188  | 0.3648258  |
| H | -10.7925305 | -3.3338424  | 0.3967843  |
| H | 2.5359582   | -11.0308257 | 0.1450984  |
| H | -10.8263582 | 3.4254114   | -0.0322720 |
| H | -9.5383262  | -5.4775465  | 0.5449565  |
| H | -8.3400684  | 7.7477782   | -0.1590493 |
| H | -7.1002554  | 9.9019707   | -0.1568543 |
| H | 4.9733879   | 11.1117456  | 0.5778611  |
| H | -12.0502815 | -1.1946042  | 0.2624725  |
| H | -12.0651529 | 1.2705150   | 0.1009782  |
| H | 8.3886213   | -7.6567920  | -0.2707895 |
| H | 7.1493603   | -9.8127340  | -0.2171854 |
| H | 10.8412139  | 3.4092302   | 0.4714978  |
| H | 12.0963043  | 1.2660417   | 0.3546378  |
| H | -4.9048894  | -11.0067082 | 0.7859496  |
| H | 8.3437946   | 7.7121489   | 0.6588687  |
| H | 9.6317031   | -5.4974587  | -0.2169213 |
| H | -9.5850245  | 5.5865032   | -0.1199338 |
| H | -7.0435055  | -9.7688402  | 0.8161809  |
| H | 5.0119108   | -11.0429265 | -0.0584611 |
| H | 9.5907915   | 5.5589261   | 0.5776337  |
| H | 10.8685093  | -3.3418457  | -0.0629489 |
| H | 7.1059580   | 9.8695400   | 0.6929206  |
| H | -2.4227888  | -11.0082216 | 0.6111655  |
| H | -8.2868826  | -7.6220287  | 0.6907897  |
| H | 0.0552927   | -11.0174083 | 0.3873603  |

---

H -2.4761847 11.1316673 0.0084732

200

Pd<sub>21</sub>/pyridnic N support 1

Pd 3.4982626 -2.2057356 5.5377713  
Pd 2.7664300 -1.1085506 3.1326668  
Pd 2.0820339 -0.0302029 5.6220304  
Pd 1.2916100 1.0172247 3.1608658  
Pd 0.9555347 -2.3864062 4.6691573  
Pd -0.4873341 -0.2347627 4.6741892  
Pd 1.5481328 -3.5351962 2.3014523  
Pd 0.3024498 -1.2268445 2.2437137  
Pd 5.3955132 -0.9682763 2.2830455  
Pd 4.6202254 0.1043908 4.6245380  
Pd 3.7941792 1.1420341 2.1194160  
Pd 3.1428960 2.2778942 4.5279634  
Pd 4.1747329 -3.2648600 2.9471313  
Pd 2.5916921 -4.4705301 4.6026261  
Pd 5.9242749 -2.2143969 4.5838449  
Pd 0.5936197 2.1118744 5.5918764  
Pd -1.8987492 1.9740617 4.7095882  
Pd 1.5271904 4.3420609 4.5261951  
Pd -1.3676132 0.8257008 2.2977094  
Pd 2.1965501 3.3305807 2.1246111  
Pd -0.2541867 3.1105805 3.0835084  
C 11.1340780 0.7066607 0.1769130  
C 11.1463444 -0.6601577 0.2371314  
C 9.9210362 -1.4285591 0.2315608  
C 9.9113594 -2.8247719 0.2763668  
C 8.6982730 -3.5797837 0.2504918  
C 8.6702457 -4.9938424 0.2955616  
C 7.4617436 -5.7294551 0.2723718  
C 7.4181520 -7.1559532 0.3353108  
C 6.2149599 -7.8660532 0.3243948  
C 6.1640893 -9.3098653 0.3911400  
C 4.9748953 -9.9871499 0.3762270  
C 3.7055775 -9.2971757 0.2957362  
C 2.4868883 -9.9756510 0.2716641  
C 1.2369337 -9.2906624 0.1913095  
C 0.0021210 -9.9750802 0.1472512  
C -1.2306015 -9.2926756 0.0569518

---

|   |             |            |            |
|---|-------------|------------|------------|
| C | -2.4821151  | -9.9785427 | 0.0056857  |
| C | -3.7004357  | -9.3018630 | -0.0681502 |
| C | -4.9723199  | -9.9901480 | -0.1106208 |
| C | -6.1575342  | -9.3077770 | -0.1659328 |
| C | -6.2012883  | -7.8617488 | -0.1813854 |
| C | -7.4007861  | -7.1468651 | -0.2077886 |
| C | -7.4377954  | -5.7194928 | -0.1977243 |
| C | -8.6476401  | -4.9880988 | -0.1919593 |
| C | -8.6743993  | -3.5760297 | -0.1507368 |
| C | -9.8917323  | -2.8302186 | -0.1175010 |
| C | -9.9081485  | -1.4365431 | -0.0474218 |
| C | -11.1383570 | -0.6768464 | -0.0015444 |
| C | -11.1352129 | 0.6890811  | 0.0782003  |
| C | -9.9023545  | 1.4449464  | 0.1197352  |
| C | -9.8822466  | 2.8371396  | 0.2028096  |
| C | -8.6630506  | 3.5789028  | 0.2408684  |
| C | -8.6376482  | 4.9878815  | 0.3134013  |
| C | -7.4272466  | 5.7177537  | 0.3307465  |
| C | -7.3956725  | 7.1426601  | 0.3819081  |
| C | -4.9787708  | 9.9952501  | 0.3732092  |
| C | -6.1977001  | 7.8599813  | 0.3716569  |
| C | -6.1602752  | 9.3055620  | 0.4076932  |
| C | -2.4907311  | 10.0022931 | 0.2416017  |
| C | -3.7051214  | 9.3141282  | 0.2983563  |
| C | -0.0012540  | 10.0132236 | 0.0870673  |
| C | -1.2372953  | 9.3259852  | 0.1563099  |
| C | 2.4900476   | 10.0173871 | -0.0619473 |
| C | 1.2345200   | 9.3354079  | 0.0000658  |
| C | 4.9834434   | 10.0190562 | -0.1662094 |
| C | 6.1669819   | 9.3314045  | -0.1969551 |
| C | 3.7078350   | 9.3365090  | -0.1270187 |
| C | 6.2074572   | 7.8847568  | -0.1910009 |
| C | 7.4022590   | 7.1633114  | -0.1822707 |
| C | 7.4329844   | 5.7343065  | -0.1459229 |
| C | 8.6397593   | 5.0045866  | -0.0960336 |
| C | 8.6620183   | 3.5918074  | -0.0333469 |
| C | 9.8795823   | 2.8511659  | 0.0360975  |
| C | 9.8984249   | 1.4572501  | 0.1074939  |
| C | 8.6530434   | 0.7217551  | 0.1112862  |
| C | 8.6697621   | -0.7009561 | 0.1725861  |
| C | 7.4456063   | -1.4318219 | 0.1673827  |
| C | 7.4502814   | -2.8611897 | 0.1802795  |

---

|   |            |            |            |
|---|------------|------------|------------|
| C | 6.2241625  | -3.5896330 | 0.1417047  |
| C | 6.2123125  | -5.0114593 | 0.1890339  |
| C | 4.9701427  | -5.7243859 | 0.1765967  |
| C | 4.9583257  | -7.1506498 | 0.2457669  |
| C | 3.7210725  | -7.8511551 | 0.2357667  |
| C | 2.4800310  | -7.1365839 | 0.1685752  |
| C | 1.2410825  | -7.8479874 | 0.1490992  |
| C | 0.0065698  | -7.1346131 | 0.0716511  |
| C | -1.2312398 | -7.8486409 | 0.0178003  |
| C | -2.4706812 | -7.1446124 | -0.0644613 |
| C | -3.7114629 | -7.8554027 | -0.0997407 |
| C | -4.9435906 | -7.1470842 | -0.1553697 |
| C | -4.9513989 | -5.7171090 | -0.1679838 |
| C | -6.1863482 | -4.9991458 | -0.1802129 |
| C | -6.1922682 | -3.5710945 | -0.1551793 |
| C | -7.4251086 | -2.8524221 | -0.1278973 |
| C | -7.4243479 | -1.4261265 | -0.0595929 |
| C | -8.6586506 | -0.7054637 | -0.0123076 |
| C | -8.6542154 | 0.7129022  | 0.0709364  |
| C | -7.4162534 | 1.4315482  | 0.1121909  |
| C | -7.4131398 | 2.8557025  | 0.1974648  |
| C | -6.1775448 | 3.5714993  | 0.2297100  |
| C | -6.1756880 | 4.9991890  | 0.2849865  |
| C | -3.7114220 | 7.8670325  | 0.2759052  |
| C | -4.9420724 | 5.7178308  | 0.2803344  |
| C | -4.9399264 | 7.1486401  | 0.3129288  |
| C | -1.2378081 | 7.8830380  | 0.1398823  |
| C | -2.4708989 | 7.1630358  | 0.2057135  |
| C | 1.2365322  | 7.8909412  | -0.0210930 |
| C | 0.0002690  | 7.1796412  | 0.0518777  |
| C | 3.7188994  | 7.8895110  | -0.1457834 |
| C | 4.9467306  | 7.1748524  | -0.1784898 |
| C | 2.4745474  | 7.1825545  | -0.1056456 |
| C | 4.9517952  | 5.7422109  | -0.1748460 |
| C | 6.1805484  | 5.0148817  | -0.1468102 |
| C | 6.1801630  | 3.5839310  | -0.0989780 |
| C | 7.4143805  | 2.8686485  | -0.0321525 |
| C | 7.4127190  | 1.4408755  | 0.0427530  |
| C | 6.1750207  | 0.7253449  | 0.0523010  |
| C | 6.1989768  | -0.7082166 | 0.1423196  |
| C | 4.9581211  | -1.4449087 | 0.0969763  |
| C | 4.9807729  | -2.8805421 | 0.0880994  |

---

|   |            |            |            |
|---|------------|------------|------------|
| C | 3.7466370  | -3.5859365 | 0.0594179  |
| C | 3.7325166  | -5.0134755 | 0.1082456  |
| C | 2.4862061  | -5.7068543 | 0.1248379  |
| C | 1.2441769  | -4.9749160 | 0.1104222  |
| C | 0.0065237  | -5.6993341 | 0.0460867  |
| C | -1.2357409 | -5.0025064 | -0.0600981 |
| C | -2.4735173 | -5.7146355 | -0.1017784 |
| C | -3.7119369 | -5.0033259 | -0.1479827 |
| C | -3.7216751 | -3.5747500 | -0.1423857 |
| C | -4.9526255 | -2.8541157 | -0.1368426 |
| C | -4.9503500 | -1.4258861 | -0.0802693 |
| C | -6.1852337 | -0.7090258 | -0.0274201 |
| C | -6.1767931 | 0.7145809  | 0.0664715  |
| C | -4.9352948 | 1.4289351  | 0.1203004  |
| C | -4.9364821 | 2.8554246  | 0.1921808  |
| C | -2.4706363 | 5.7293686  | 0.1914942  |
| C | -3.6993608 | 3.5724116  | 0.1995890  |
| C | -3.7002821 | 5.0056970  | 0.2293817  |
| C | 0.0007569  | 5.7474086  | 0.0436222  |
| C | -1.2335995 | 5.0227932  | 0.1182787  |
| C | 2.4765388  | 5.7561646  | -0.1215241 |
| C | 3.7128845  | 5.0353713  | -0.1628890 |
| C | 1.2362188  | 5.0534565  | -0.0350607 |
| C | 3.7187842  | 3.6055040  | -0.1301251 |
| C | 4.9377185  | 2.8698774  | -0.1012904 |
| C | 4.9120406  | 1.4260202  | -0.0223172 |
| C | 3.6494649  | 0.6845152  | -0.0716423 |
| C | 3.6824529  | -0.7858369 | -0.0956776 |
| N | 2.5509898  | -1.4850003 | -0.1848193 |
| C | 2.5341013  | -2.8138624 | -0.0220467 |
| C | 1.2477325  | -3.5195568 | 0.1206484  |
| C | -0.0459729 | -2.8337908 | 0.0752075  |
| C | -1.2534217 | -3.5779025 | -0.0658392 |
| C | -2.4880308 | -2.8635742 | -0.1020121 |
| C | -2.4907041 | -1.4403966 | -0.0627773 |
| C | -3.7152045 | -0.7125032 | -0.0413450 |
| C | -3.6987224 | 0.7106606  | 0.0853828  |
| C | -1.2346356 | 3.5956250  | 0.1082807  |
| C | -2.4471848 | 1.4209036  | 0.1563637  |
| C | -2.4622882 | 2.8630835  | 0.1613993  |
| C | 1.2350904  | 3.6172812  | 0.0012219  |
| C | 2.4717839  | 2.8891371  | -0.0593421 |

---

|   |             |             |            |
|---|-------------|-------------|------------|
| C | 2.3962099   | 1.4417353   | -0.1583052 |
| C | 0.0001816   | 2.8910108   | 0.0210115  |
| C | 0.0658041   | 1.4625294   | -0.0619064 |
| N | 1.2201746   | 0.8102346   | -0.2184562 |
| N | -0.0861256  | -1.4783463  | 0.2229480  |
| C | -1.2387804  | -0.7659694  | 0.0771979  |
| C | -1.1827296  | 0.6978502   | 0.1219313  |
| H | -4.9790734  | 11.0906117  | 0.3974463  |
| H | -0.0049042  | 11.1091357  | 0.1024246  |
| H | 12.0975665  | -1.2016287  | 0.2871754  |
| H | 2.4917199   | 11.1133877  | -0.0471120 |
| H | -10.8425577 | -3.3751292  | -0.1393115 |
| H | 2.4830195   | -11.0709538 | 0.3116374  |
| H | -10.8310614 | 3.3848424   | 0.2375438  |
| H | -9.5973509  | -5.5349947  | -0.2067076 |
| H | -8.3458408  | 7.6875701   | 0.4217313  |
| H | -7.1121575  | 9.8455162   | 0.4595123  |
| H | 4.9841758   | 11.1147043  | -0.1630760 |
| H | -12.0865255 | -1.2252835  | -0.0302436 |
| H | -12.0809590 | 1.2413276   | 0.1133018  |
| H | 8.3629849   | -7.7079395  | 0.3978559  |
| H | 7.1100883   | -9.8588883  | 0.4536283  |
| H | 10.8287830  | 3.3991374   | 0.0346876  |
| H | 12.0763826  | 1.2658175   | 0.1785137  |
| H | -4.9679746  | -11.0856285 | -0.0932801 |
| H | 8.3546777   | 7.7058140   | -0.1874366 |
| H | 9.6193958   | -5.5385719  | 0.3557586  |
| H | -9.5870269  | 5.5344028   | 0.3475161  |
| H | -7.1068238  | -9.8540819  | -0.1927949 |
| H | 4.9642752   | -11.0815878 | 0.4259513  |
| H | 9.5909193   | 5.5489585   | -0.0949731 |
| H | 10.8647938  | -3.3628993  | 0.3276899  |
| H | 7.1181890   | 9.8747092   | -0.2181877 |
| H | -2.4798328  | -11.0743331 | 0.0313923  |
| H | -8.3495407  | -7.6955414  | -0.2241705 |
| H | 0.0014056   | -11.0704997 | 0.1804728  |
| H | -2.4971074  | 11.0982659  | 0.2577740  |

200

Pd<sub>21</sub>/pyridinic N support 2

|    |            |            |           |
|----|------------|------------|-----------|
| Pd | -0.8490785 | -2.2223707 | 5.0436034 |
|----|------------|------------|-----------|



---

|    |            |             |            |
|----|------------|-------------|------------|
| Pd | -2.0143265 | -1.1266058  | 2.7978686  |
| Pd | -2.3938713 | -0.1179542  | 5.3390366  |
| Pd | -3.5229698 | 0.9384368   | 2.9870279  |
| Pd | -3.5029076 | -2.4965238  | 4.4935732  |
| Pd | -5.0329651 | -0.3901539  | 4.7076363  |
| Pd | -2.9943639 | -3.5066016  | 1.9614044  |
| Pd | -4.6659794 | -1.4178553  | 2.2163397  |
| Pd | 0.8742558  | -0.6360772  | 1.6380224  |
| Pd | 0.0080119  | 0.1855314   | 4.1578696  |
| Pd | -1.0647522 | 1.1221753   | 1.8664752  |
| Pd | -1.5363843 | 2.2518774   | 4.2576903  |
| Pd | -0.3780968 | -3.0820410  | 2.3725395  |
| Pd | -1.7834148 | -4.4682498  | 4.1254808  |
| Pd | 1.4521369  | -1.9665771  | 3.8232894  |
| Pd | -3.9522266 | 1.9934996   | 5.4899243  |
| Pd | -6.4969593 | 1.7791504   | 4.8799190  |
| Pd | -3.1547088 | 4.2748544   | 4.4118021  |
| Pd | -6.1917575 | 0.8148294   | 2.4045569  |
| Pd | -2.6963657 | 3.2740106   | 1.9312679  |
| Pd | -5.0514729 | 3.0635511   | 3.1340409  |
| C  | 11.0479723 | 0.7026117   | 0.6502787  |
| C  | 11.0545193 | -0.6644945  | 0.6244010  |
| C  | 9.8267432  | -1.4235484  | 0.5408279  |
| C  | 9.8159658  | -2.8167200  | 0.4862414  |
| C  | 8.6020089  | -3.5603092  | 0.3954672  |
| C  | 8.5798579  | -4.9697949  | 0.3233690  |
| C  | 7.3748306  | -5.7000657  | 0.2244861  |
| C  | 7.3464272  | -7.1234133  | 0.1448625  |
| C  | 6.1500179  | -7.8351619  | 0.0530093  |
| C  | 6.1147217  | -9.2786784  | -0.0196023 |
| C  | 4.9322891  | -9.9608942  | -0.1007997 |
| C  | 3.6597065  | -9.2743226  | -0.1193063 |
| C  | 2.4480330  | -9.9612263  | -0.1829189 |
| C  | 1.1946195  | -9.2823103  | -0.1977609 |
| C  | -0.0361116 | -9.9754866  | -0.2301098 |
| C  | -1.2741194 | -9.2989817  | -0.2230369 |
| C  | -2.5260456 | -9.9884648  | -0.1951496 |
| C  | -3.7481142 | -9.3157106  | -0.1419095 |
| C  | -5.0190254 | -10.0047765 | -0.0730854 |
| C  | -6.2047099 | -9.3246891  | 0.0112345  |
| C  | -6.2524326 | -7.8786616  | 0.0312522  |
| C  | -7.4471334 | -7.1623520  | 0.1428773  |

---

|   |             |            |            |
|---|-------------|------------|------------|
| C | -7.4847761  | -5.7330670 | 0.1701512  |
| C | -8.6848179  | -4.9995055 | 0.3198847  |
| C | -8.7082808  | -3.5841864 | 0.3634918  |
| C | -9.9074596  | -2.8330478 | 0.5608531  |
| C | -9.9112612  | -1.4364647 | 0.6275168  |
| C | -11.1175183 | -0.6711242 | 0.8603494  |
| C | -11.1019302 | 0.6964503  | 0.9232407  |
| C | -9.8800977  | 1.4541664  | 0.7536495  |
| C | -9.8555009  | 2.8507783  | 0.7546064  |
| C | -8.6567916  | 3.5974799  | 0.5321800  |
| C | -8.6335741  | 5.0096878  | 0.4827954  |
| C | -7.4415156  | 5.7333551  | 0.2521697  |
| C | -7.4119043  | 7.1608290  | 0.1998090  |
| C | -5.0151164  | 10.0065603 | -0.1658264 |
| C | -6.2287789  | 7.8747604  | 0.0070851  |
| C | -6.1919214  | 9.3205812  | -0.0335056 |
| C | -2.5280536  | 10.0046781 | -0.3280264 |
| C | -3.7438523  | 9.3219839  | -0.2606359 |
| C | -0.0353953  | 10.0042383 | -0.3480305 |
| C | -1.2731807  | 9.3224680  | -0.3562512 |
| C | 2.4545072   | 10.0003529 | -0.2442339 |
| C | 1.2001546   | 9.3200554  | -0.2986477 |
| C | 4.9401197   | 10.0013081 | -0.0680108 |
| C | 6.1171297   | 9.3144873  | 0.0567867  |
| C | 3.6675158   | 9.3176038  | -0.1421471 |
| C | 6.1500967   | 7.8694978  | 0.1214667  |
| C | 7.3383376   | 7.1515598  | 0.2568518  |
| C | 7.3627943   | 5.7258352  | 0.3239166  |
| C | 8.5663093   | 4.9997539  | 0.4496506  |
| C | 8.5832221   | 3.5901683  | 0.5002544  |
| C | 9.7985492   | 2.8495823  | 0.5874048  |
| C | 9.8151167   | 1.4562979  | 0.5933367  |
| C | 8.5670050   | 0.7243442  | 0.5292407  |
| C | 8.5754545   | -0.6946697 | 0.5043361  |
| C | 7.3427874   | -1.4144718 | 0.4304615  |
| C | 7.3509705   | -2.8396397 | 0.3762896  |
| C | 6.1240724   | -3.5597409 | 0.2950996  |
| C | 6.1226575   | -4.9822784 | 0.2062392  |
| C | 4.8903578   | -5.6933024 | 0.1011405  |
| C | 4.8912898   | -7.1204004 | 0.0287582  |
| C | 3.6617605   | -7.8274840 | -0.0594484 |
| C | 2.4197600   | -7.1171321 | -0.0839502 |

---

C 1.1915792 -7.8393534 -0.1653833  
C -0.0441762 -7.1316471 -0.2073031  
C -1.2785568 -7.8547536 -0.2257952  
C -2.5230318 -7.1576084 -0.2080952  
C -3.7644956 -7.8696080 -0.1421679  
C -4.9966125 -7.1646357 -0.0590959  
C -5.0081251 -5.7354766 -0.0513730  
C -6.2377437 -5.0144368 0.0569093  
C -6.2445543 -3.5869478 0.0793410  
C -7.4667518 -2.8625391 0.2259176  
C -7.4579745 -1.4358668 0.2745422  
C -8.6723010 -0.7075690 0.4749549  
C -8.6548573 0.7140343 0.5492134  
C -7.4232538 1.4429410 0.3903483  
C -7.4242816 2.8776833 0.3342811  
C -6.2098637 3.5856946 0.0841217  
C -6.2049518 5.0126316 0.0623967  
C -3.7535138 7.8747876 -0.2590880  
C -4.9815227 5.7305872 -0.1247660  
C -4.9772755 7.1606935 -0.1376436  
C -1.2747634 7.8794110 -0.3608730  
C -2.5135320 7.1664768 -0.3421276  
C 1.2004382 7.8763897 -0.2777966  
C -0.0372644 7.1690410 -0.3338033  
C 3.6724453 7.8706719 -0.0941593  
C 4.8941053 7.1568666 0.0413715  
C 2.4339242 7.1632410 -0.1742217  
C 4.8914363 5.7270740 0.1079944  
C 6.1129883 5.0047787 0.2543151  
C 6.1046127 3.5764222 0.3312408  
C 7.3350194 2.8666742 0.4466516  
C 7.3281672 1.4411350 0.4778750  
C 6.0866259 0.7236246 0.4414398  
C 6.1010596 -0.6988951 0.4115912  
C 4.8707625 -1.4245771 0.3696677  
C 4.8823807 -2.8471870 0.3004988  
C 3.6512632 -3.5559178 0.1948496  
C 3.6476111 -4.9804041 0.0806566  
C 2.4132064 -5.6831236 -0.0138225  
C 1.1797161 -4.9527961 -0.0667585  
C -0.0464310 -5.6954591 -0.2012079  
C -1.2882954 -5.0126097 -0.2565091

---

|   |            |            |            |
|---|------------|------------|------------|
| C | -2.5264345 | -5.7331905 | -0.2244124 |
| C | -3.7674599 | -5.0308364 | -0.1416209 |
| C | -3.7737404 | -3.5931199 | -0.1347662 |
| C | -5.0100705 | -2.8711263 | -0.0279763 |
| C | -4.9823291 | -1.4315389 | -0.0288031 |
| C | -6.2204300 | -0.7178454 | 0.1456336  |
| C | -6.1907012 | 0.7229864  | 0.1543822  |
| C | -4.9713569 | 1.4389033  | -0.1529995 |
| C | -4.9845410 | 2.8605734  | -0.1194238 |
| C | -2.5151743 | 5.7383579  | -0.3525857 |
| C | -3.7474695 | 3.5823703  | -0.2154954 |
| C | -3.7454335 | 5.0228902  | -0.2531794 |
| C | -0.0369488 | 5.7355138  | -0.3226906 |
| C | -1.2709916 | 5.0261633  | -0.3666503 |
| C | 2.4320392  | 5.7322248  | -0.1252468 |
| C | 3.6551226  | 5.0145084  | 0.0260840  |
| C | 1.1959005  | 5.0241568  | -0.2128053 |
| C | 3.6498315  | 3.5838639  | 0.1109702  |
| C | 4.8631052  | 2.8571869  | 0.2828986  |
| C | 4.8340788  | 1.4254502  | 0.3880824  |
| C | 3.5876049  | 0.7076968  | 0.4055889  |
| C | 3.6123270  | -0.7456098 | 0.4662178  |
| N | 2.4755102  | -1.4928651 | 0.5925784  |
| C | 2.4263410  | -2.8213058 | 0.2674083  |
| C | 1.1704242  | -3.5136008 | 0.0303101  |
| C | -0.0867803 | -2.8136186 | -0.2354543 |
| C | -1.2987265 | -3.5828091 | -0.2751289 |
| C | -2.5383745 | -2.8653255 | -0.2909142 |
| C | -2.5355467 | -1.4369766 | -0.3989123 |
| C | -3.7558431 | -0.7127105 | -0.3029236 |
| C | -3.7490502 | 0.7145270  | -0.3422127 |
| C | -1.2650436 | 3.5986182  | -0.3294708 |
| C | -2.4954017 | 1.4077737  | -0.3816137 |
| C | -2.5024944 | 2.8550954  | -0.2915653 |
| C | 1.1960427  | 3.5988382  | -0.1530255 |
| C | 2.4177591  | 2.8791664  | 0.0257490  |
| C | 2.3694661  | 1.4581803  | 0.1933182  |
| C | -0.0305427 | 2.8925505  | -0.2418796 |
| C | -0.0066625 | 1.4568569  | -0.1314094 |
| N | 1.1760584  | 0.8164936  | 0.1293577  |
| N | -0.1038353 | -1.4699137 | -0.4329414 |
| C | -1.2654265 | -0.7804466 | -0.4647429 |

---

|   |             |             |            |
|---|-------------|-------------|------------|
| C | -1.2398864  | 0.6801704   | -0.3518674 |
| H | -5.0152998  | 11.1020183  | -0.1846529 |
| H | -0.0340028  | 11.1002395  | -0.3521305 |
| H | 12.0015247  | -1.2142259  | 0.6618711  |
| H | 2.4586088   | 11.0961741  | -0.2698096 |
| H | -10.8530227 | -3.3747068  | 0.6779319  |
| H | 2.4540167   | -11.0566888 | -0.2171258 |
| H | -10.7915872 | 3.3993128   | 0.9088816  |
| H | -9.6294437  | -5.5459901  | 0.4205415  |
| H | -8.3526108  | 7.7090172   | 0.3259876  |
| H | -7.1392149  | 9.8638767   | 0.0553521  |
| H | 4.9423462   | 11.0961365  | -0.1100020 |
| H | -12.0591608 | -1.2166735  | 0.9872615  |
| H | -12.0320106 | 1.2491889   | 1.0957449  |
| H | 8.2961160   | -7.6702454  | 0.1600024  |
| H | 7.0665022   | -9.8209472  | -0.0053705 |
| H | 10.7466362  | 3.3975458   | 0.6344097  |
| H | 11.9902779  | 1.2586595   | 0.7087681  |
| H | -5.0134530  | -11.1003762 | -0.0816563 |
| H | 8.2888600   | 7.6942685   | 0.3144374  |
| H | 9.5300585   | -5.5156852  | 0.3415778  |
| H | -9.5693026  | 5.5612260   | 0.6273652  |
| H | -7.1505312  | -9.8744726  | 0.0705201  |
| H | 4.9287491   | -11.0552846 | -0.1515791 |
| H | 9.5155623   | 5.5452026   | 0.4973168  |
| H | 10.7667326  | -3.3614290  | 0.5088301  |
| H | 7.0678129   | 9.8560105   | 0.1143108  |
| H | -2.5185542  | -11.0844987 | -0.1952021 |
| H | -8.3922453  | -7.7119383  | 0.2214521  |
| H | -0.0271699  | -11.0712645 | -0.2421820 |
| H | -2.5296415  | 11.1007302  | -0.3276263 |

201

Pd<sub>21</sub>/pyrrolic N support

|    |           |            |           |
|----|-----------|------------|-----------|
| Pd | 5.9300436 | -2.9988783 | 5.3358121 |
| Pd | 4.9270567 | -3.6929063 | 2.7941872 |
| Pd | 3.5883757 | -4.1454598 | 5.2584407 |
| Pd | 2.5978082 | -4.6669729 | 2.6311495 |
| Pd | 5.7598390 | -5.5974337 | 4.5159545 |
| Pd | 3.3864225 | -6.6384952 | 4.3198638 |
| Pd | 7.3660290 | -5.2264822 | 2.3436028 |
| Pd | 4.8219665 | -6.2949409 | 2.0362053 |

---

|    |             |             |            |
|----|-------------|-------------|------------|
| Pd | 5.3413031   | -1.2067993  | 1.9192050  |
| Pd | 3.9084865   | -1.6666220  | 4.2553718  |
| Pd | 2.7878353   | -2.0071298  | 1.8349427  |
| Pd | 1.5346265   | -2.7371102  | 4.1506396  |
| Pd | 7.3155847   | -2.6203673  | 2.9570028  |
| Pd | 8.0546853   | -4.3570497  | 4.7454259  |
| Pd | 6.3432287   | -0.6247759  | 4.3196915  |
| Pd | 1.2266925   | -5.2239303  | 5.0195890  |
| Pd | 0.9613929   | -7.6792848  | 4.1815812  |
| Pd | -0.8164791  | -3.9286884  | 4.0417499  |
| Pd | 2.3079935   | -7.2480803  | 1.8918488  |
| Pd | 0.3612599   | -3.2811615  | 1.7509123  |
| Pd | 0.2081023   | -5.8001026  | 2.5590355  |
| C  | 11.1407930  | 0.8010995   | 0.4320409  |
| C  | 11.1602458  | -0.5624415  | 0.5248175  |
| C  | 9.9521185   | -1.3340772  | 0.3901367  |
| C  | 9.9626477   | -2.7275597  | 0.5132792  |
| C  | 8.7894002   | -3.4895604  | 0.3372633  |
| C  | 8.7689383   | -4.9105676  | 0.5862891  |
| C  | 7.6238479   | -5.7036457  | 0.2330581  |
| C  | 7.6172056   | -7.1333084  | 0.4115642  |
| C  | 6.4506400   | -7.9042081  | 0.2566254  |
| C  | 6.4025279   | -9.3365394  | 0.3965657  |
| C  | 5.2270263   | -10.0433249 | 0.2840730  |
| C  | 3.9587812   | -9.3915176  | 0.0653195  |
| C  | 2.7254616   | -10.0594264 | 0.0597829  |
| C  | 1.4754687   | -9.3655769  | -0.0167350 |
| C  | 0.2258658   | -10.0052880 | 0.0888284  |
| C  | -0.9899389  | -9.2848338  | 0.0868189  |
| C  | -2.2400383  | -9.9360168  | 0.2385940  |
| C  | -3.4356855  | -9.2235085  | 0.2630553  |
| C  | -4.6989965  | -9.9052196  | 0.4021842  |
| C  | -5.8750143  | -9.2141701  | 0.4275457  |
| C  | -5.8959626  | -7.7748842  | 0.3328805  |
| C  | -7.0938340  | -7.0722602  | 0.3611044  |
| C  | -7.1240596  | -5.6552599  | 0.2962415  |
| C  | -8.3456992  | -4.9561094  | 0.3253276  |
| C  | -8.3949453  | -3.5523340  | 0.2881733  |
| C  | -9.6330768  | -2.8445009  | 0.3171763  |
| C  | -9.6924687  | -1.4529766  | 0.3059387  |
| C  | -10.9421300 | -0.7249756  | 0.3345716  |
| C  | -10.9771110 | 0.6429686   | 0.3340662  |

---

|   |            |            |            |
|---|------------|------------|------------|
| C | -9.7642821 | 1.4302492  | 0.3070887  |
| C | -9.7760445 | 2.8264806  | 0.3131790  |
| C | -8.5742802 | 3.5983475  | 0.2887770  |
| C | -8.5697031 | 5.0121099  | 0.2874485  |
| C | -7.3710757 | 5.7658541  | 0.2614395  |
| C | -7.3491233 | 7.1948723  | 0.2515029  |
| C | -4.9404635 | 10.0665924 | 0.1650184  |
| C | -6.1564608 | 7.9254909  | 0.2180080  |
| C | -6.1213377 | 9.3724742  | 0.2027819  |
| C | -2.4414974 | 10.0798318 | 0.0863287  |
| C | -3.6595051 | 9.3931675  | 0.1351697  |
| C | 0.0581788  | 10.0837447 | -0.0085434 |
| C | -1.1830285 | 9.4035935  | 0.0482882  |
| C | 2.5535324  | 10.0726784 | -0.1100906 |
| C | 1.2943113  | 9.3993524  | -0.0544387 |
| C | 5.0450502  | 10.0576623 | -0.1912594 |
| C | 6.2225999  | 9.3610130  | -0.2101019 |
| C | 3.7664633  | 9.3821750  | -0.1490914 |
| C | 6.2506848  | 7.9145968  | -0.1881245 |
| C | 7.4373694  | 7.1861383  | -0.1698672 |
| C | 7.4539839  | 5.7589101  | -0.1287977 |
| C | 8.6552821  | 5.0349505  | -0.0547311 |
| C | 8.6693550  | 3.6258885  | 0.0105484  |
| C | 9.8843590  | 2.9094908  | 0.1545557  |
| C | 9.9060751  | 1.5186606  | 0.2318112  |
| C | 8.6704107  | 0.7749483  | 0.1183398  |
| C | 8.7032878  | -0.6440172 | 0.1577584  |
| C | 7.5003503  | -1.3954728 | -0.0203464 |
| C | 7.5707104  | -2.8201721 | -0.0319839 |
| C | 6.3895657  | -3.5822192 | -0.3001783 |
| C | 6.4134528  | -5.0158953 | -0.1907507 |
| C | 5.2138437  | -5.7902771 | -0.3176664 |
| C | 5.2063533  | -7.2131474 | -0.0274068 |
| C | 3.9753993  | -7.9538855 | -0.1035318 |
| C | 2.7448943  | -7.2435649 | -0.3373226 |
| C | 1.4809219  | -7.9193924 | -0.1832690 |
| C | 0.2406563  | -7.1757761 | -0.2770774 |
| C | -0.9871269 | -7.8465462 | -0.0689632 |
| C | -2.1892236 | -7.0794731 | -0.0166063 |
| C | -3.4267444 | -7.7767716 | 0.1519753  |
| C | -4.6436365 | -7.0562534 | 0.2073258  |
| C | -4.6340268 | -5.6235914 | 0.1482885  |

---

|   |            |            |            |
|---|------------|------------|------------|
| C | -5.8786358 | -4.9272106 | 0.2067644  |
| C | -5.8973118 | -3.5042761 | 0.1817026  |
| C | -7.1552807 | -2.8134040 | 0.2304950  |
| C | -7.2060417 | -1.3916114 | 0.2272389  |
| C | -8.4613999 | -0.6971110 | 0.2688171  |
| C | -8.5011976 | 0.7218828  | 0.2738046  |
| C | -7.2836635 | 1.4659730  | 0.2502051  |
| C | -7.3122421 | 2.8937213  | 0.2611034  |
| C | -6.0948057 | 3.6347065  | 0.2430589  |
| C | -6.1112330 | 5.0631674  | 0.2399127  |
| C | -3.6637489 | 7.9473125  | 0.1536028  |
| C | -4.8868007 | 5.7966284  | 0.2101600  |
| C | -4.8913276 | 7.2255118  | 0.1958899  |
| C | -1.1824875 | 7.9611972  | 0.0687126  |
| C | -2.4180665 | 7.2480035  | 0.1256745  |
| C | 1.2949189  | 7.9540438  | -0.0415119 |
| C | 0.0564383  | 7.2514323  | 0.0262586  |
| C | 3.7697505  | 7.9339045  | -0.1404354 |
| C | 4.9895987  | 7.2076006  | -0.1641425 |
| C | 2.5270813  | 7.2336713  | -0.0887191 |
| C | 4.9844589  | 5.7734225  | -0.1500560 |
| C | 6.2022569  | 5.0360593  | -0.1383975 |
| C | 6.1914629  | 3.6019255  | -0.1165316 |
| C | 7.4247632  | 2.8934620  | -0.0476040 |
| C | 7.4235140  | 1.4673369  | -0.0151876 |
| C | 6.1835421  | 0.7373817  | -0.0968411 |
| C | 6.2169897  | -0.7012318 | -0.1033857 |
| C | 4.9848756  | -1.4696339 | -0.2775964 |
| C | 5.1516561  | -2.9095191 | -0.5031459 |
| C | 4.0105850  | -3.7101095 | -0.7367265 |
| C | 3.9985811  | -5.1316675 | -0.6719120 |
| C | 2.7604106  | -5.8506538 | -0.6812913 |
| C | 1.5198682  | -5.1654520 | -0.7498138 |
| C | 0.2543085  | -5.7610311 | -0.4949990 |
| C | -0.9162005 | -4.9333703 | -0.2941333 |
| C | -2.1631101 | -5.6301653 | -0.0906964 |
| C | -3.3901783 | -4.9024773 | 0.0296152  |
| C | -3.3807666 | -3.4588312 | 0.0362308  |
| C | -4.6584133 | -2.7764252 | 0.1227792  |
| C | -4.7285269 | -1.3536119 | 0.1474423  |
| C | -5.9842271 | -0.6574987 | 0.1958857  |
| C | -6.0322653 | 0.7682788  | 0.2171055  |



---

|   |             |            |            |
|---|-------------|------------|------------|
| C | -4.8208368  | 1.5099193  | 0.2139873  |
| C | -4.8470125  | 2.9342951  | 0.2264343  |
| C | -2.4133979  | 5.8187216  | 0.1506657  |
| C | -3.6270136  | 3.6697393  | 0.2095695  |
| C | -3.6404887  | 5.0969535  | 0.1927084  |
| C | 0.0605323   | 5.8208218  | 0.0516000  |
| C | -1.1737228  | 5.1124587  | 0.1229443  |
| C | 2.5261945   | 5.8010416  | -0.0764540 |
| C | 3.7473274   | 5.0646663  | -0.1202163 |
| C | 1.2903679   | 5.1044544  | -0.0001749 |
| C | 3.7411510   | 3.6295036  | -0.1196849 |
| C | 4.9494406   | 2.8745856  | -0.1380269 |
| C | 4.9189596   | 1.4290532  | -0.1575967 |
| C | 3.6627856   | 0.6975104  | -0.1799228 |
| C | 3.6573767   | -0.7653938 | -0.2910421 |
| C | 2.5162272   | -1.6959921 | -0.4597334 |
| C | 2.7754504   | -3.0672067 | -0.7605972 |
| C | 1.5671401   | -3.7745425 | -0.7693250 |
| C | 0.5018002   | -2.8822529 | -0.4552883 |
| C | -0.8619537  | -3.4390041 | -0.2141588 |
| C | -2.1363994  | -2.7191608 | -0.0288068 |
| C | -2.2344072  | -1.2641196 | 0.0938027  |
| C | -3.5179316  | -0.6122726 | 0.1449047  |
| C | -3.5738741  | 0.8111248  | 0.1944912  |
| C | -1.1669491  | 3.6925896  | 0.1566126  |
| C | -2.3687899  | 1.5517658  | 0.2056629  |
| C | -2.3897351  | 2.9729072  | 0.2008981  |
| C | 1.2929817   | 3.6754389  | 0.0259179  |
| C | 2.5056950   | 2.9338492  | -0.0533444 |
| C | 2.4485048   | 1.4942642  | -0.0494363 |
| C | 0.0629809   | 2.9826130  | 0.1216428  |
| C | 0.1096507   | 1.5610279  | 0.1636396  |
| N | 1.2584359   | 0.8812218  | 0.0995291  |
| N | 1.1150583   | -1.6127483 | -0.4574949 |
| H | 0.6209060   | -0.7712342 | -0.1324937 |
| N | -1.1156565  | -0.5165603 | 0.1654143  |
| C | -1.1486458  | 0.8195759  | 0.2032146  |
| H | -4.9491302  | 11.1622101 | 0.1537494  |
| H | 0.0606800   | 11.1797559 | -0.0184504 |
| H | 12.1003707  | -1.0967576 | 0.6993647  |
| H | 2.5633132   | 11.1687129 | -0.1171227 |
| H | -10.5636485 | -3.4223942 | 0.3525178  |

---

|   |             |             |            |
|---|-------------|-------------|------------|
| H | 2.7073441   | -11.1476797 | 0.1820010  |
| H | -10.7378101 | 3.3518014   | 0.3376031  |
| H | -9.2809641  | -5.5239355  | 0.3844232  |
| H | -8.3036856  | 7.7336204   | 0.2674611  |
| H | -7.0742371  | 9.9129913   | 0.2215929  |
| H | 5.0522970   | 11.1532094  | -0.2021937 |
| H | -11.8742709 | -1.3004182  | 0.3577924  |
| H | -11.9372130 | 1.1705716   | 0.3565432  |
| H | 8.5618715   | -7.6298937  | 0.6570177  |
| H | 7.3391731   | -9.8654893  | 0.6023130  |
| H | 10.8245796  | 3.4680007   | 0.2228707  |
| H | 12.0660979  | 1.3800021   | 0.5243289  |
| H | -4.6905047  | -10.9975802 | 0.4829071  |
| H | 8.3957554   | 7.7179248   | -0.1722681 |
| H | 9.7221347   | -5.4112777  | 0.7898731  |
| H | -9.5284895  | 5.5430571   | 0.3040315  |
| H | -6.8311972  | -9.7390702  | 0.5267330  |
| H | 5.2350142   | -11.1326796 | 0.3966183  |
| H | 9.6078202   | 5.5759210   | -0.0274282 |
| H | 10.8984206  | -3.2379669  | 0.7650309  |
| H | 7.1788752   | 9.8951017   | -0.2357408 |
| H | -2.2631928  | -11.0269824 | 0.3386238  |
| H | -8.0402296  | -7.6184823  | 0.4424194  |
| H | 0.1918123   | -11.0935731 | 0.2093833  |
| H | -2.4483124  | 11.1759104  | 0.0729848  |
